# Supplementary material
Source: PubMed Central journal article supplement (PMC5724758)
Supplement: NIHMS899316-supplement-2.pdf [file NIHMS899316-supplement-2.pdf]

# Supplementary Figure S1

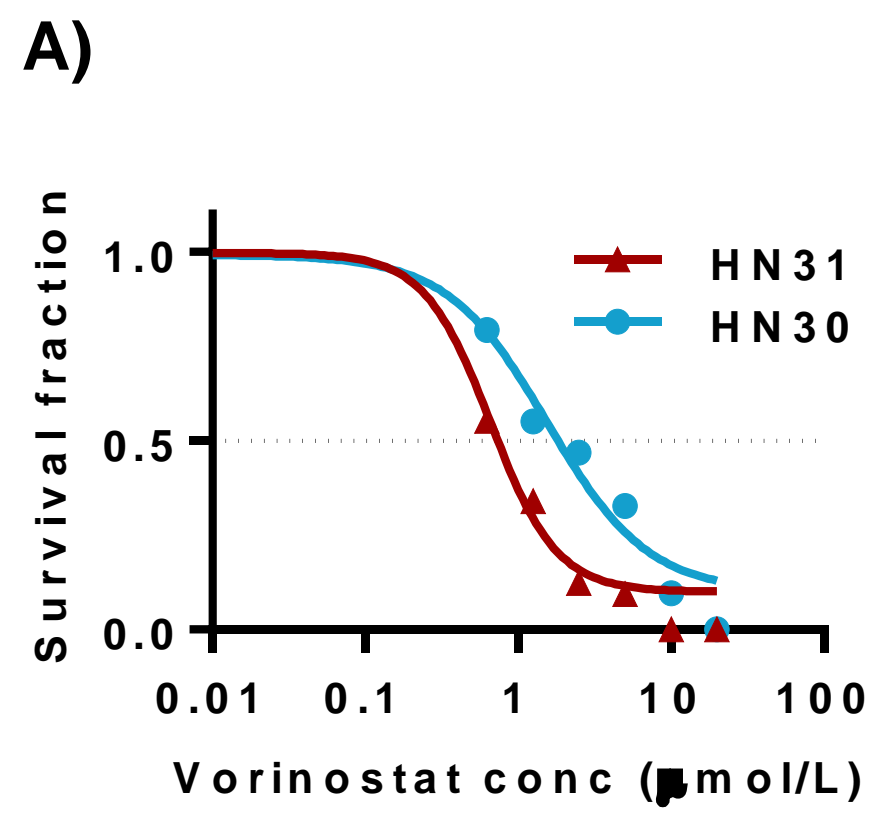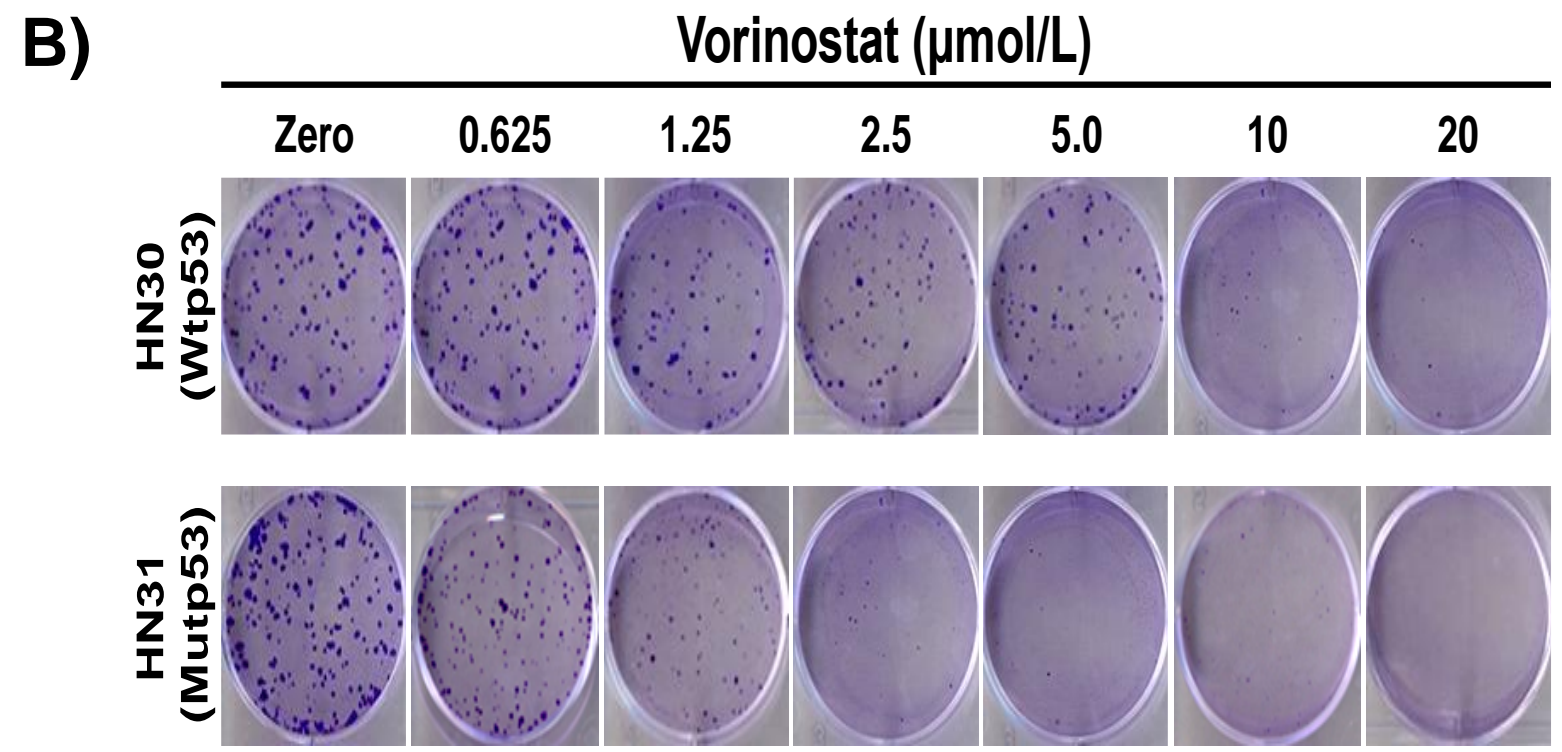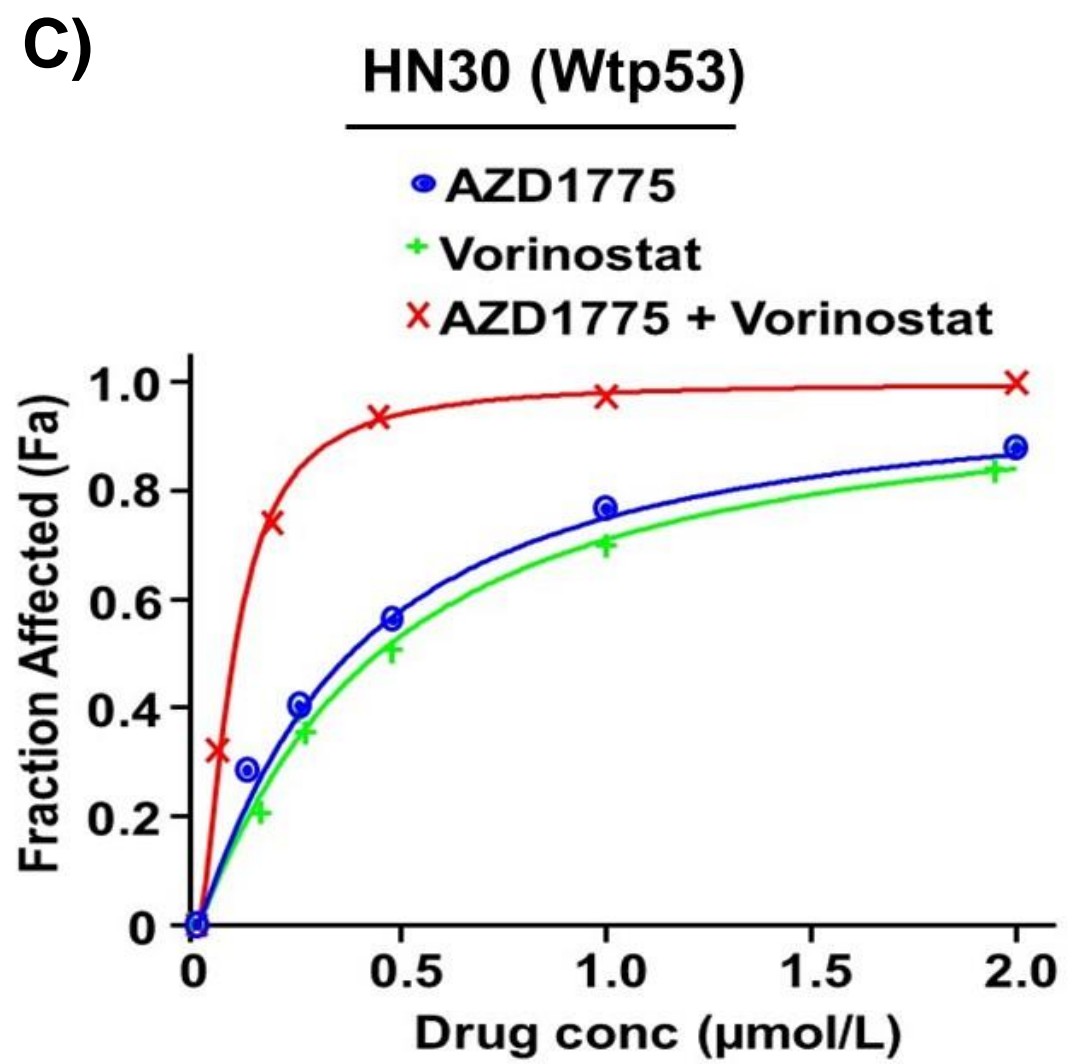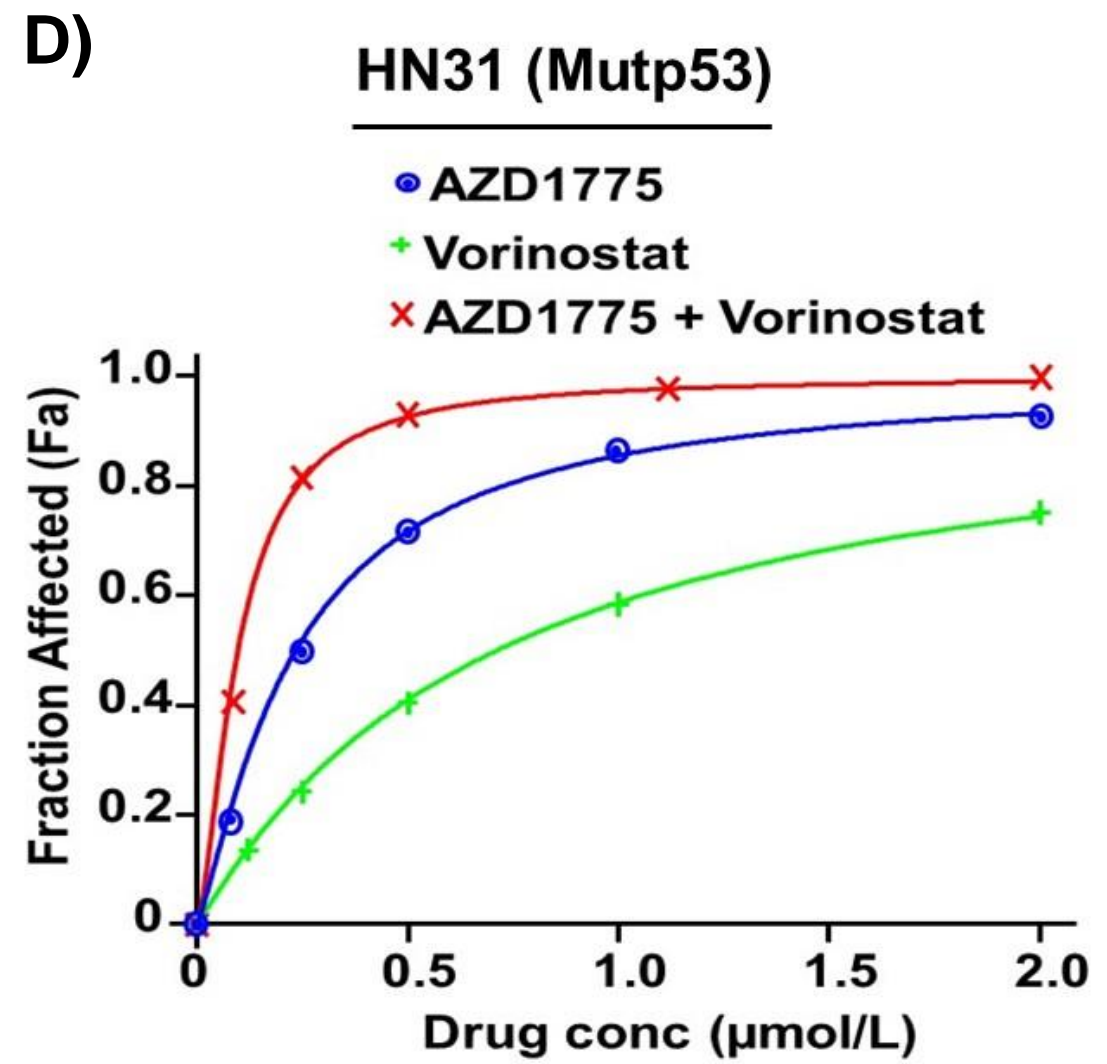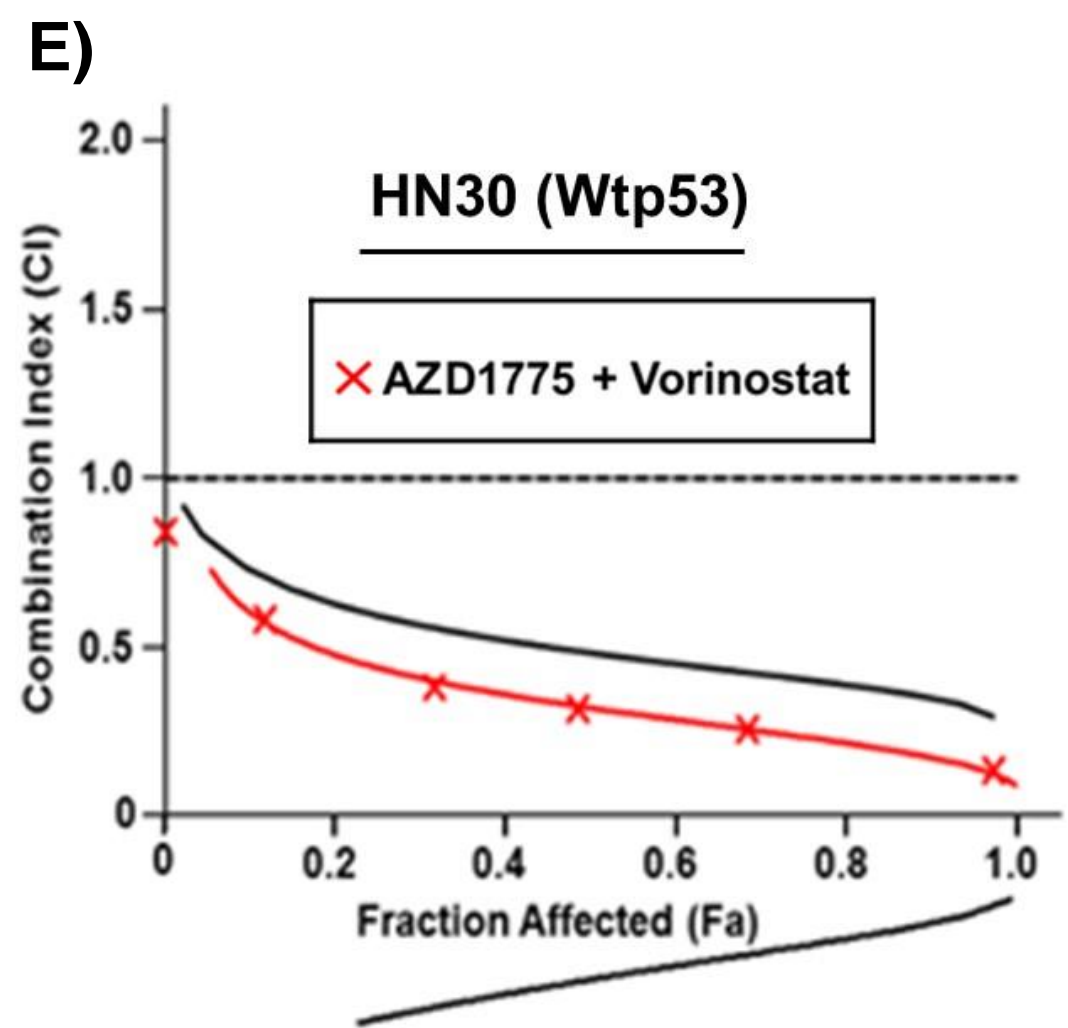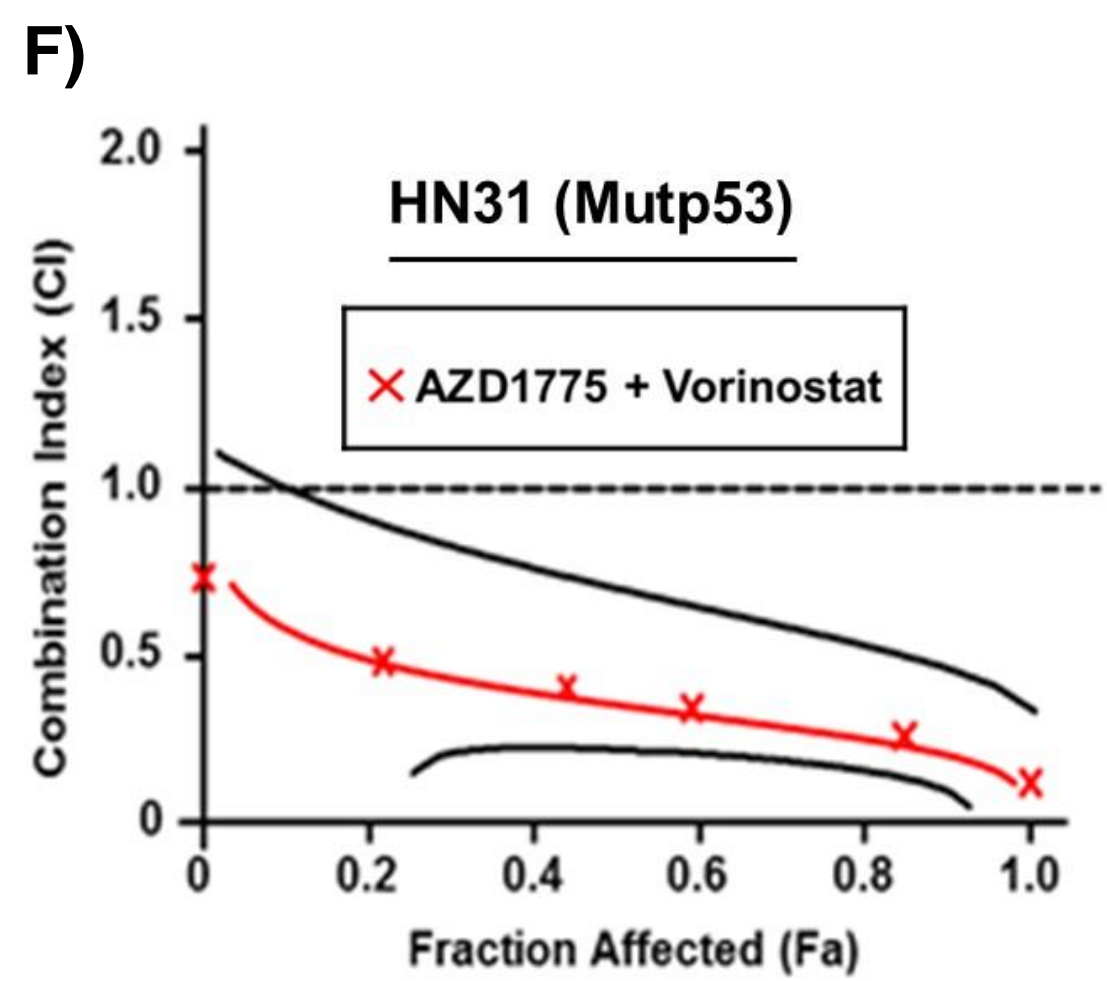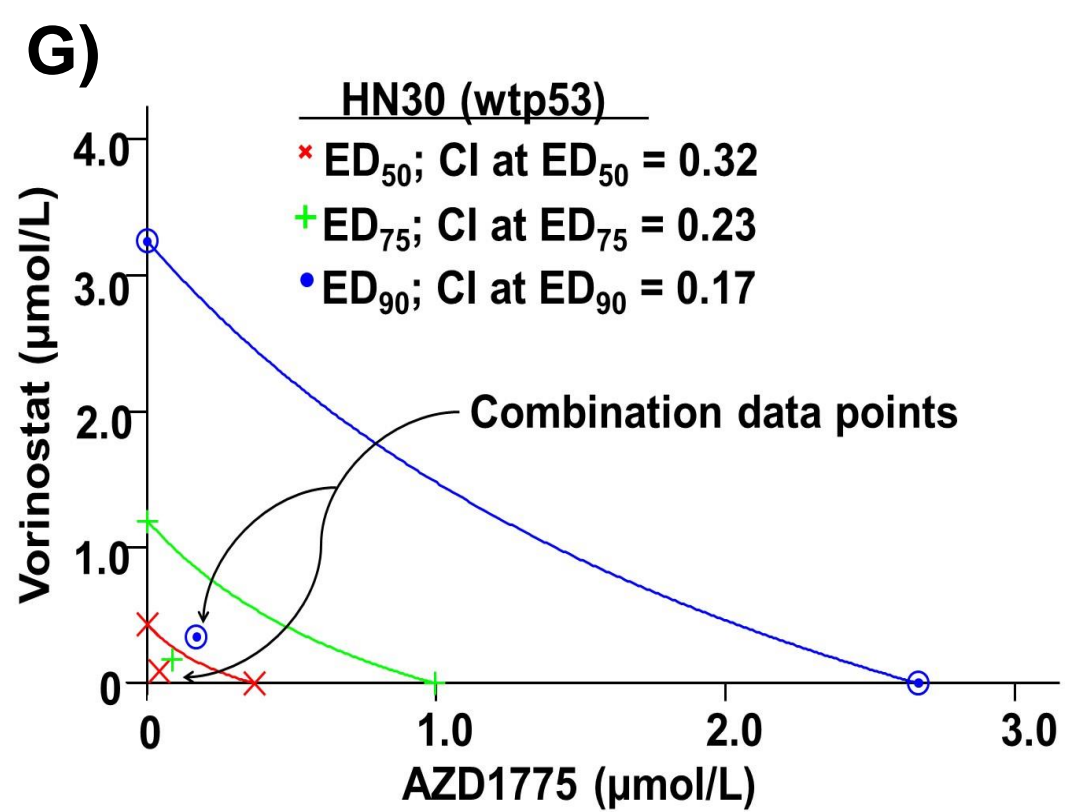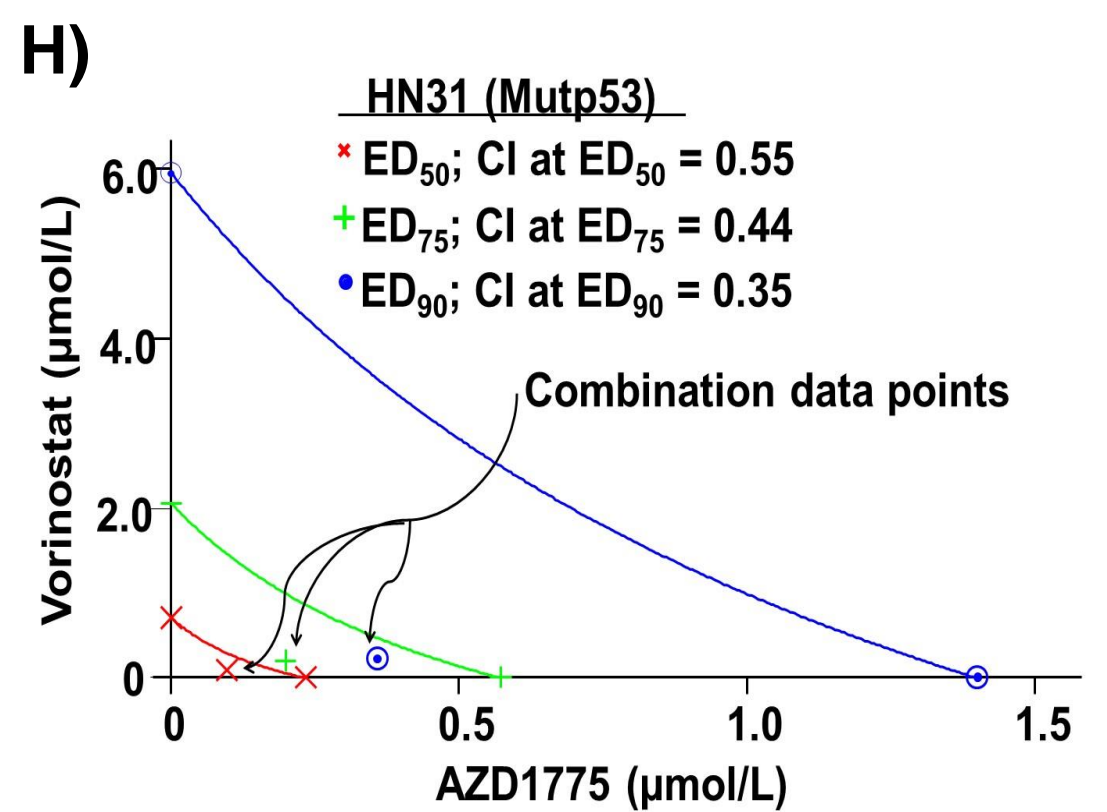

# Supplementary Figure S2

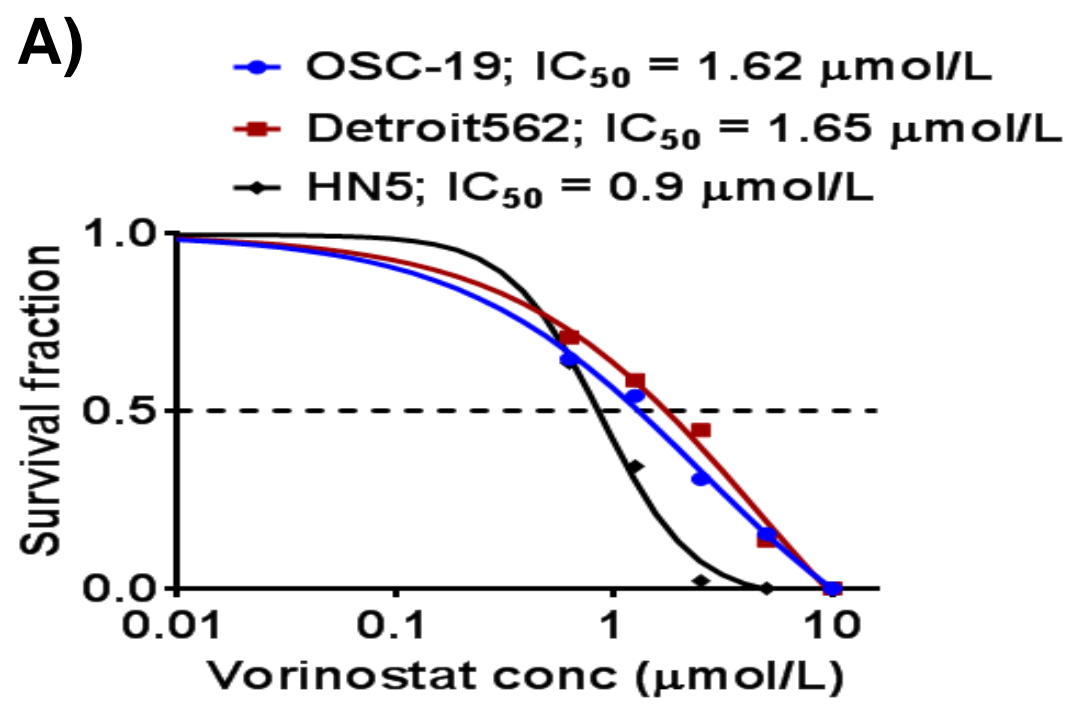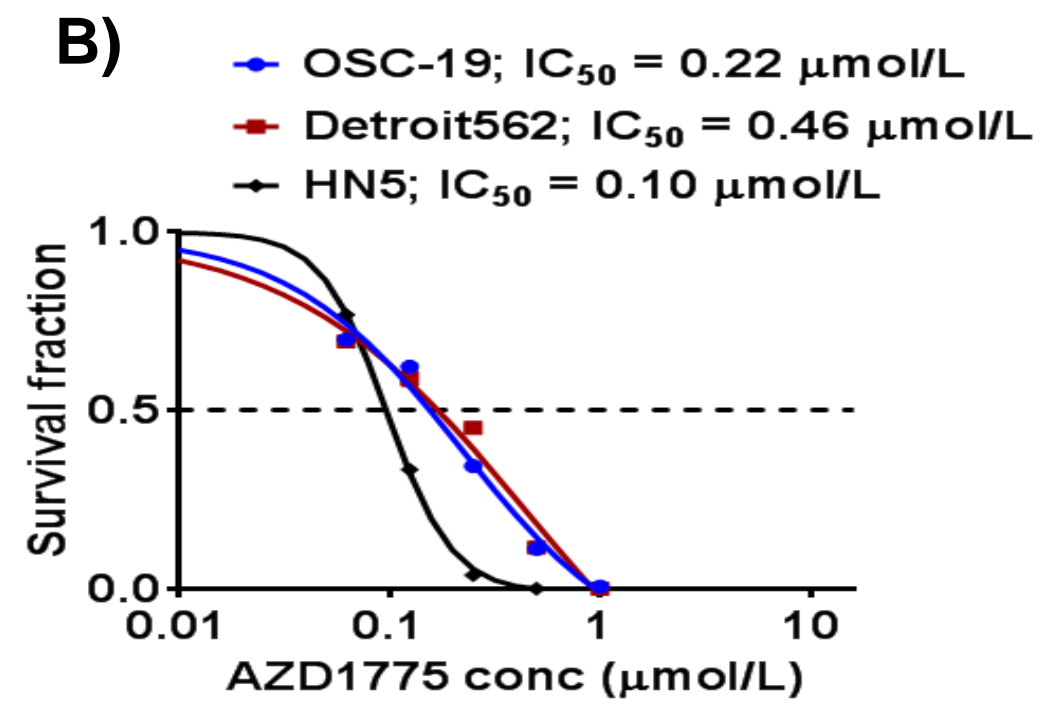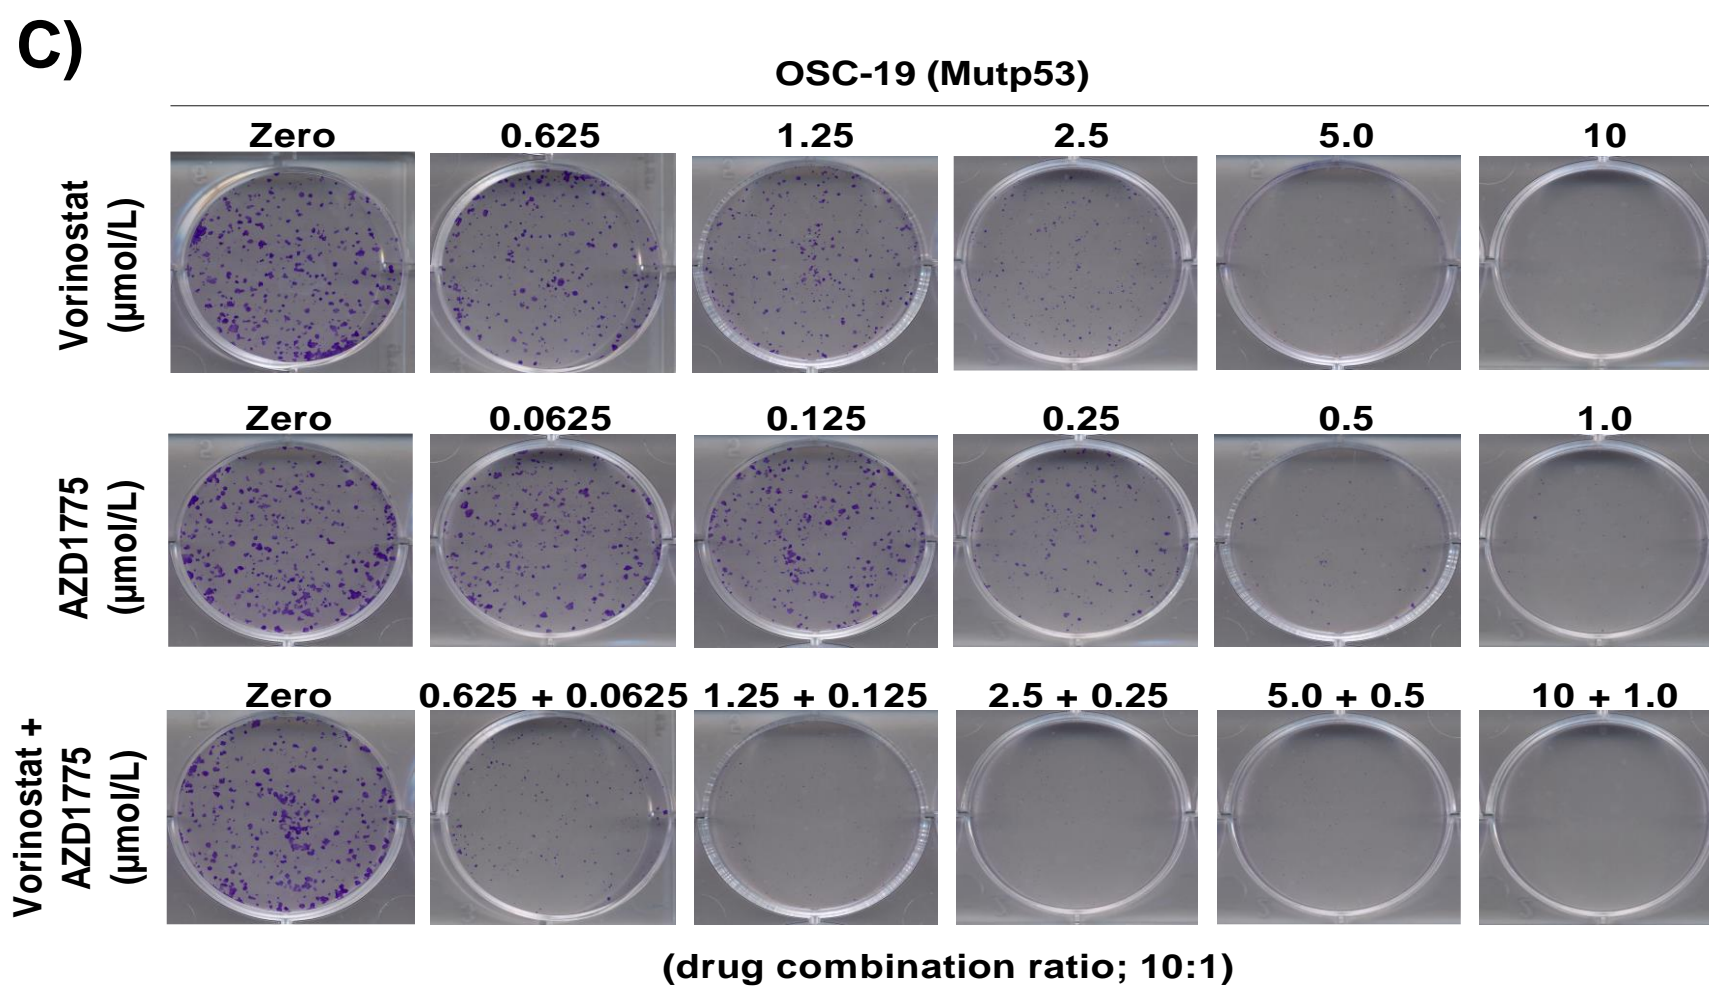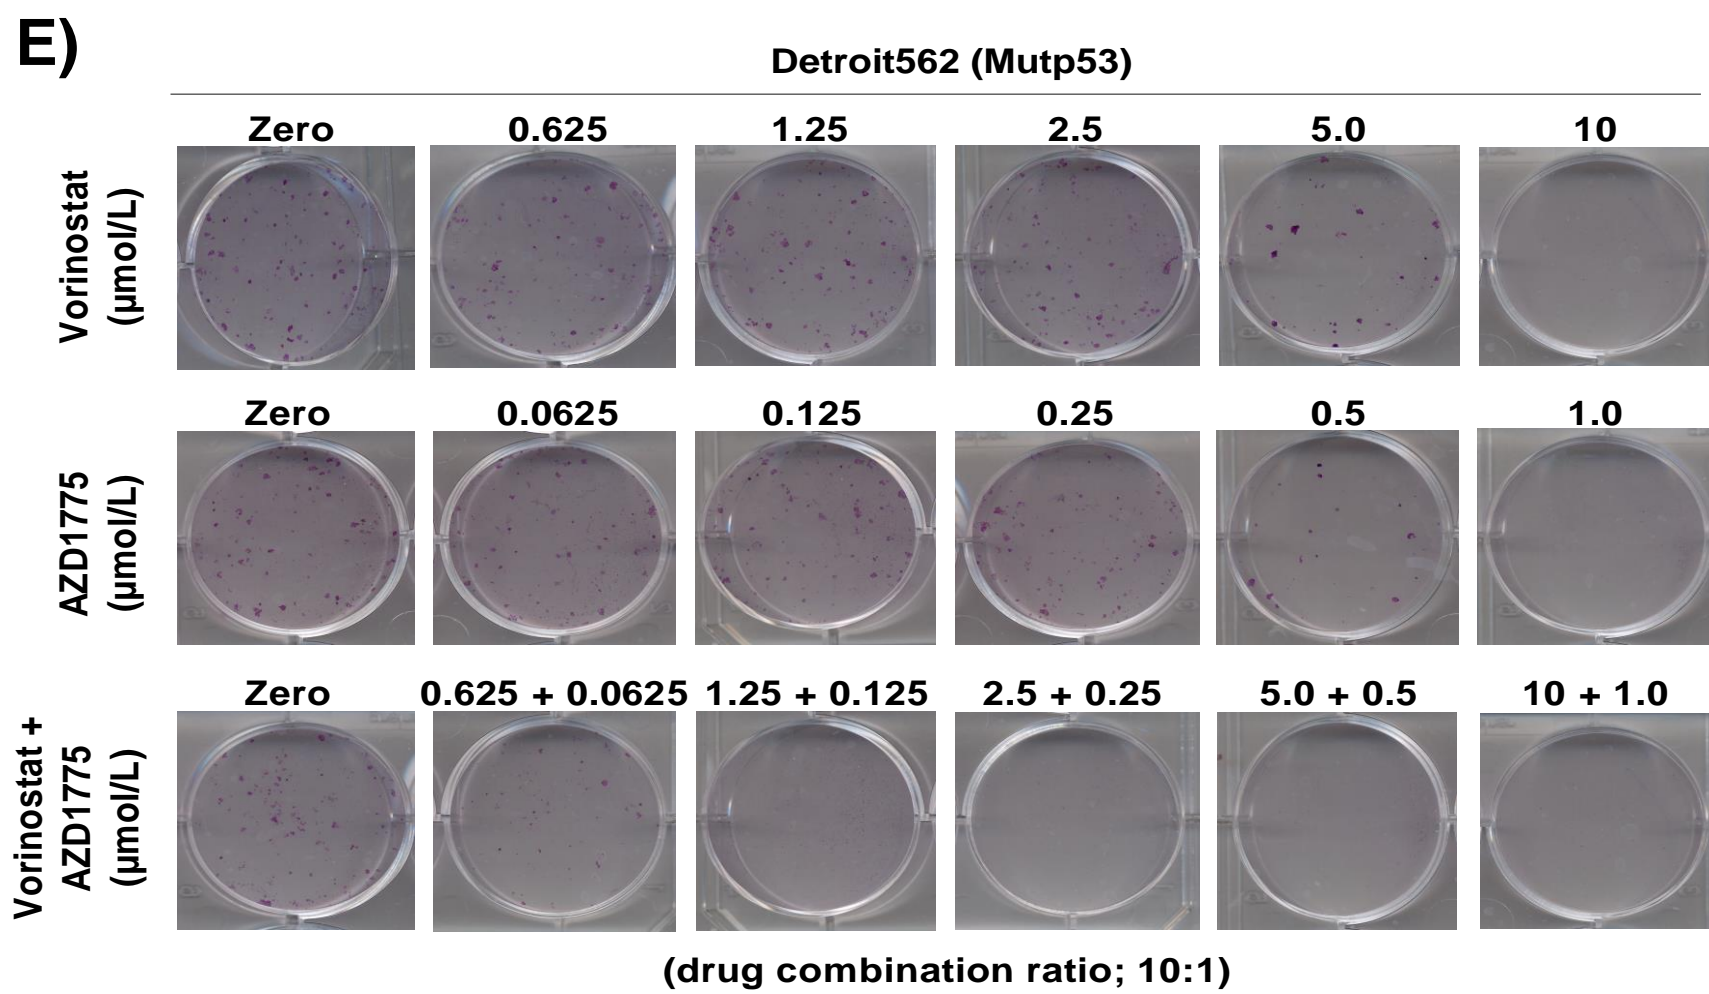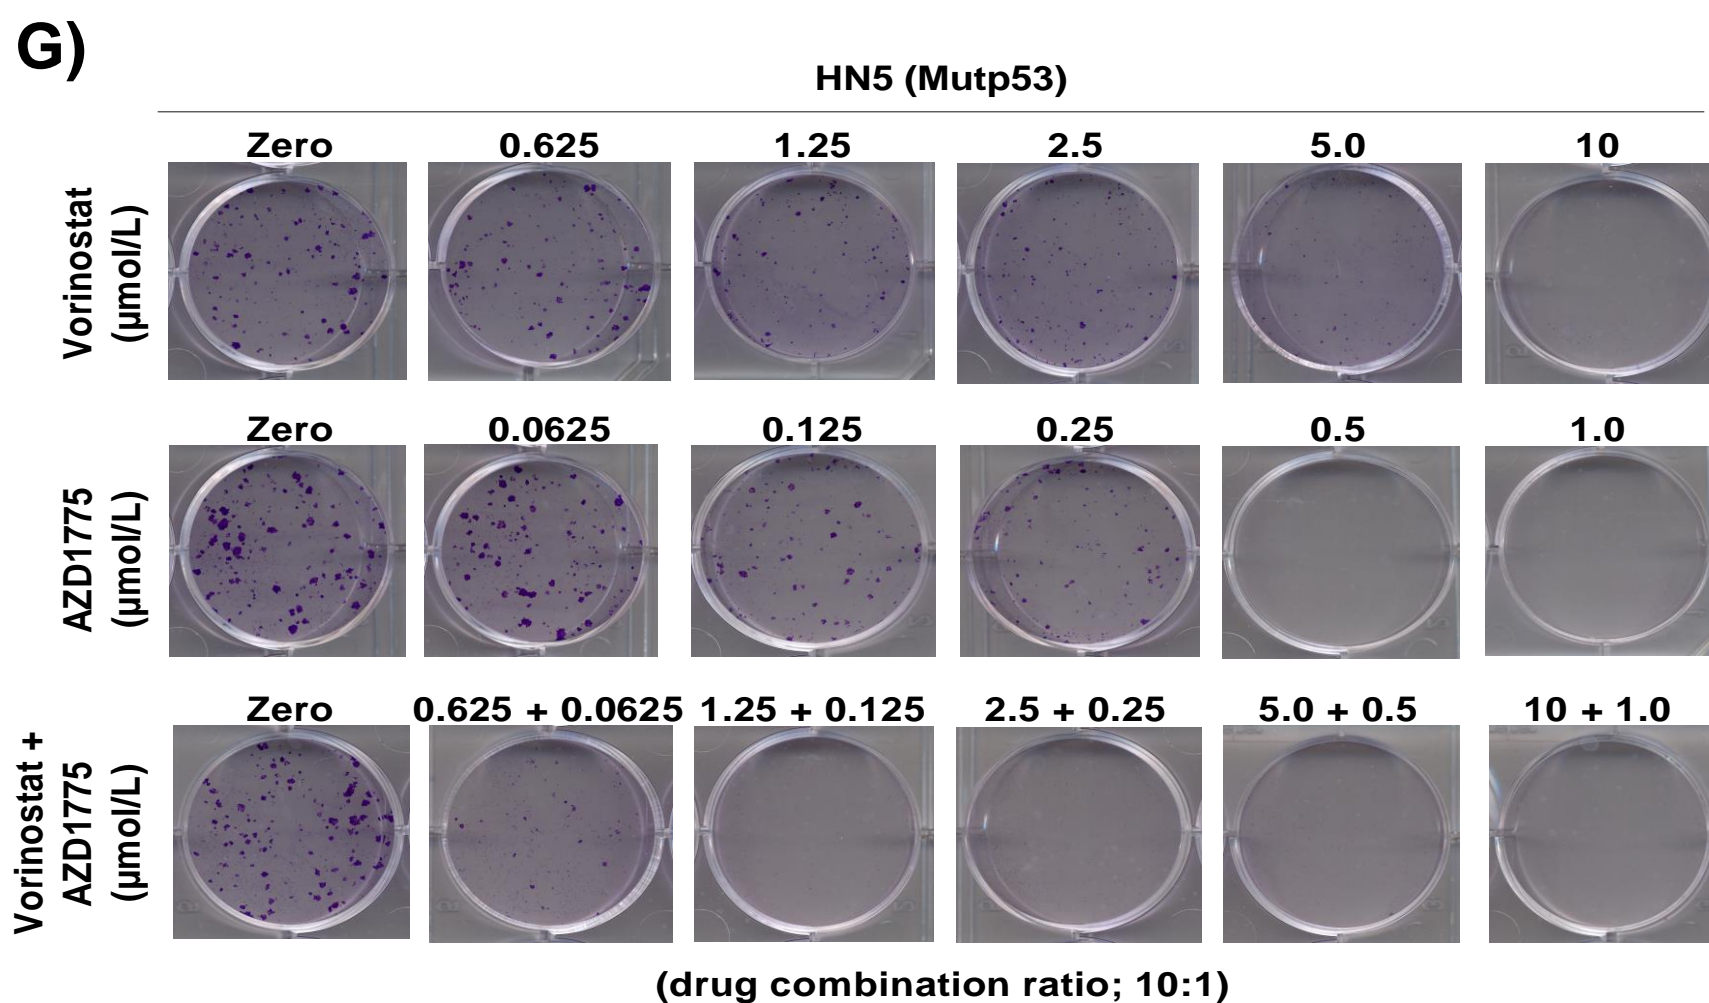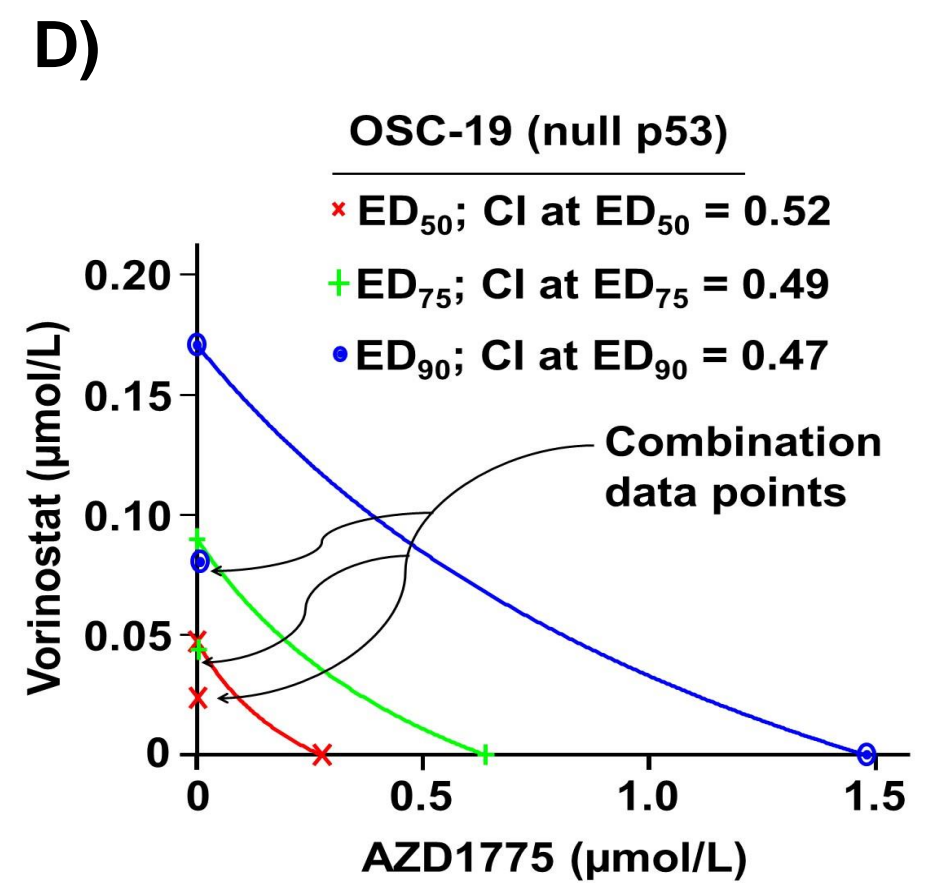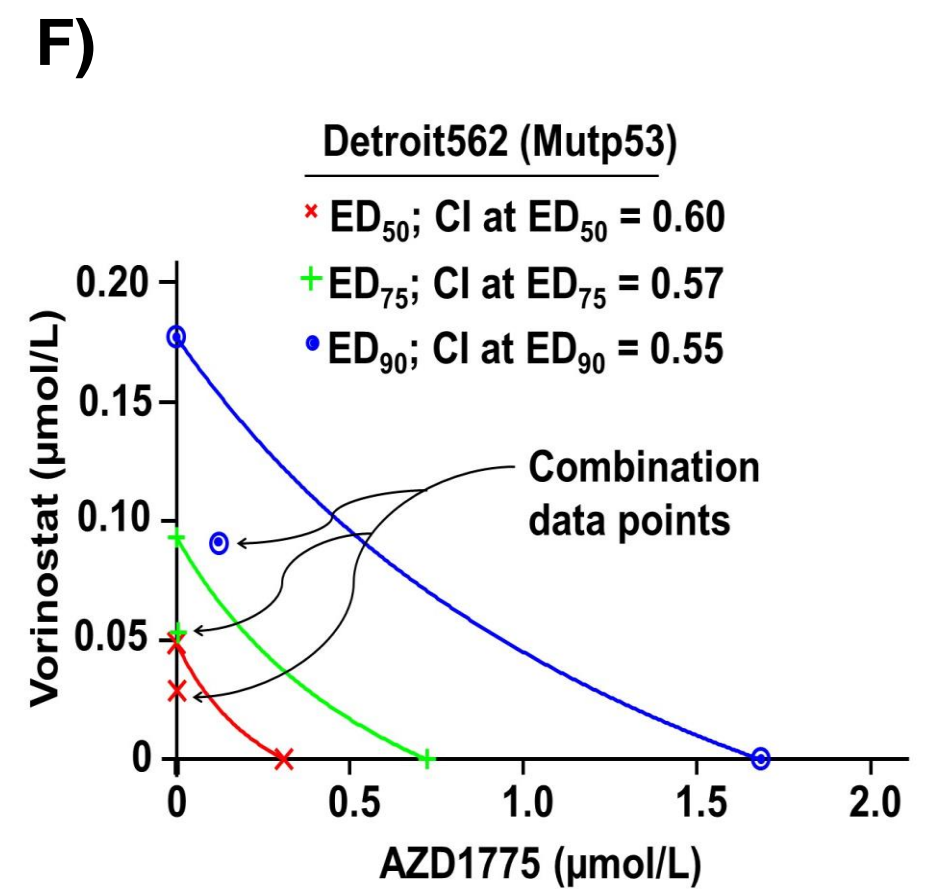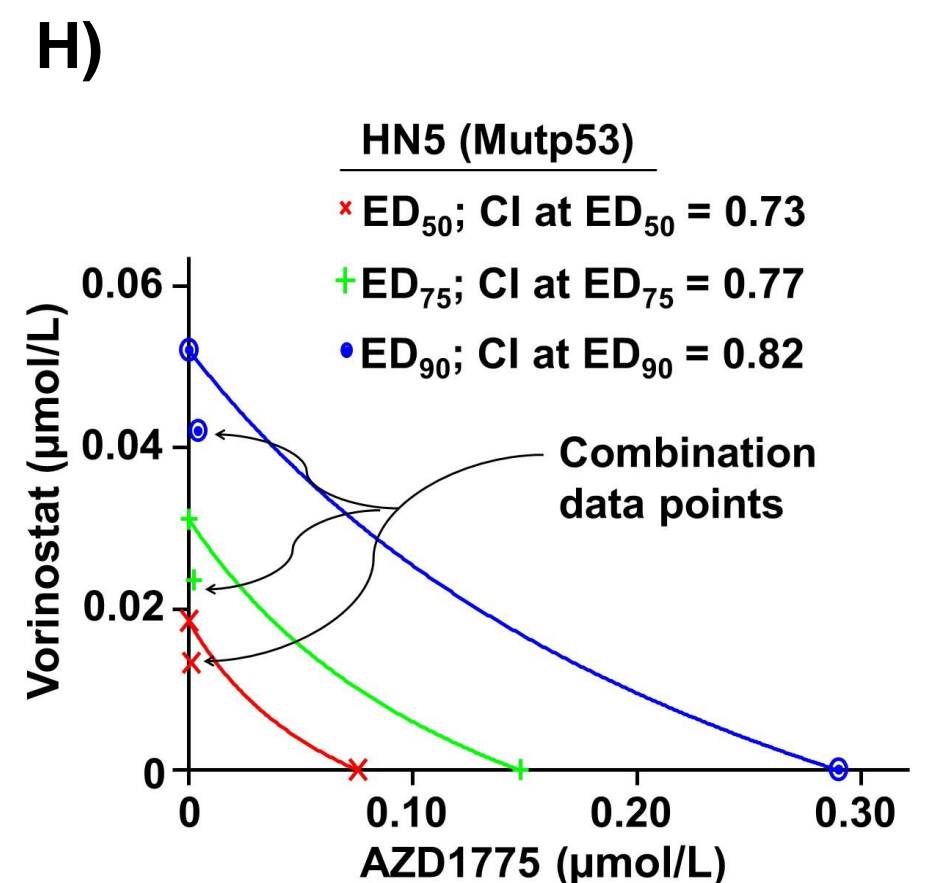

Supplementary Figure S3.

A)

Vorinostat + AZD1775

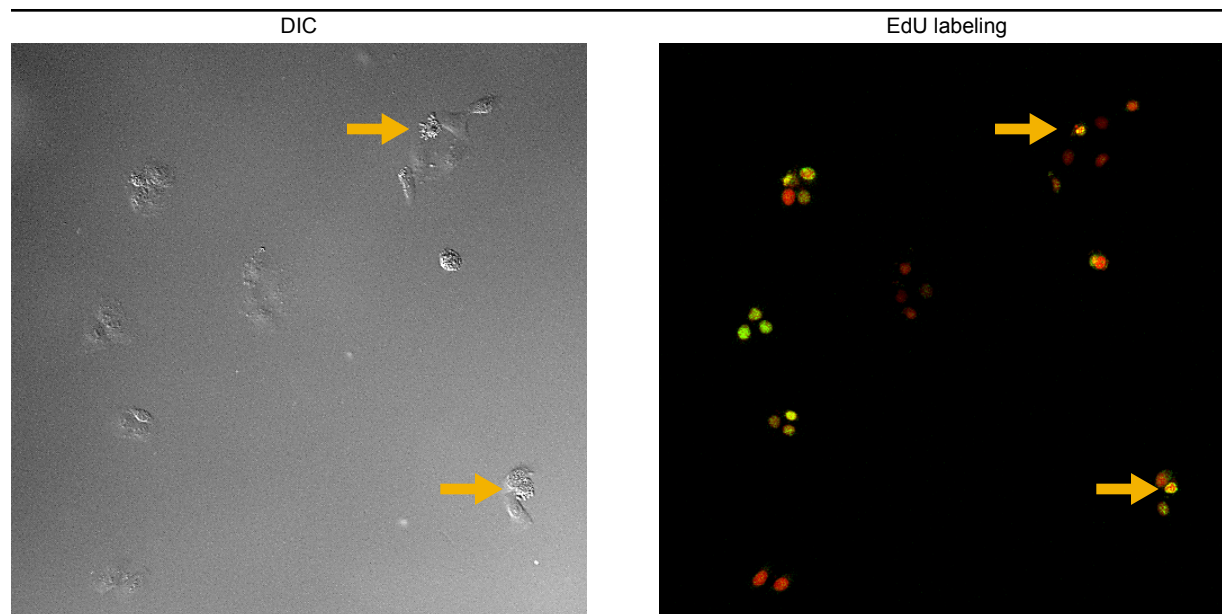

B)

Vorinostat + AZD1775

DIC

EdU labeling

DIC

EdU labeling

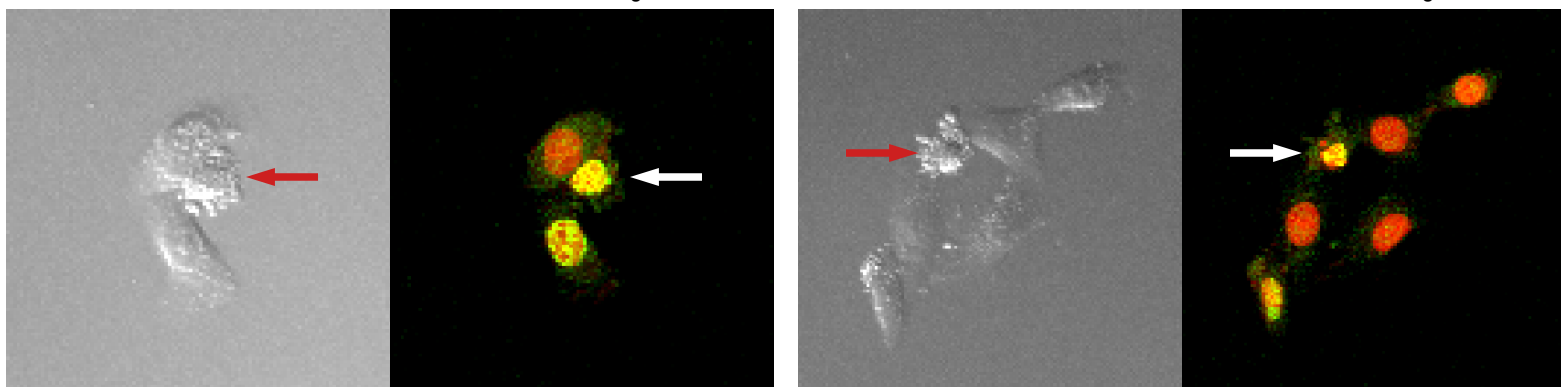

# Supplementary Figure S4

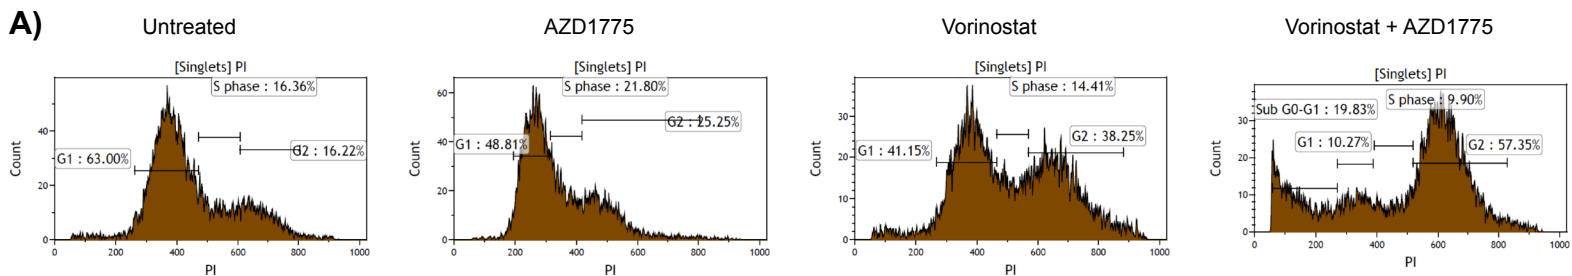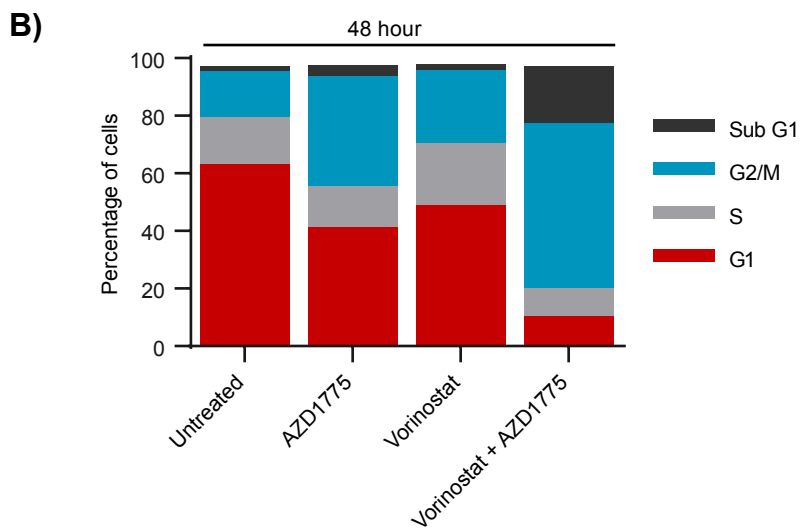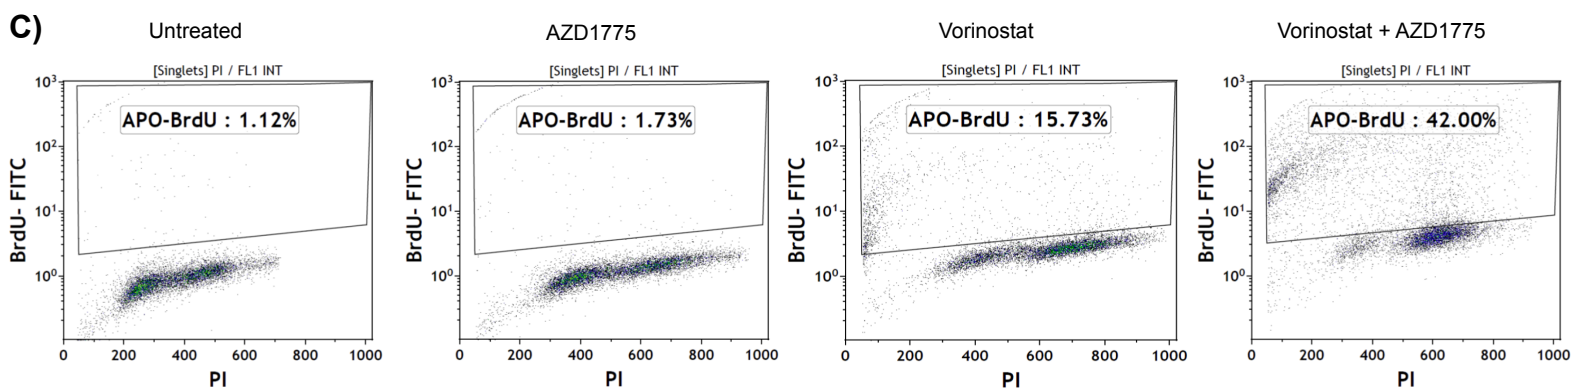

# Supplementary Figure S5

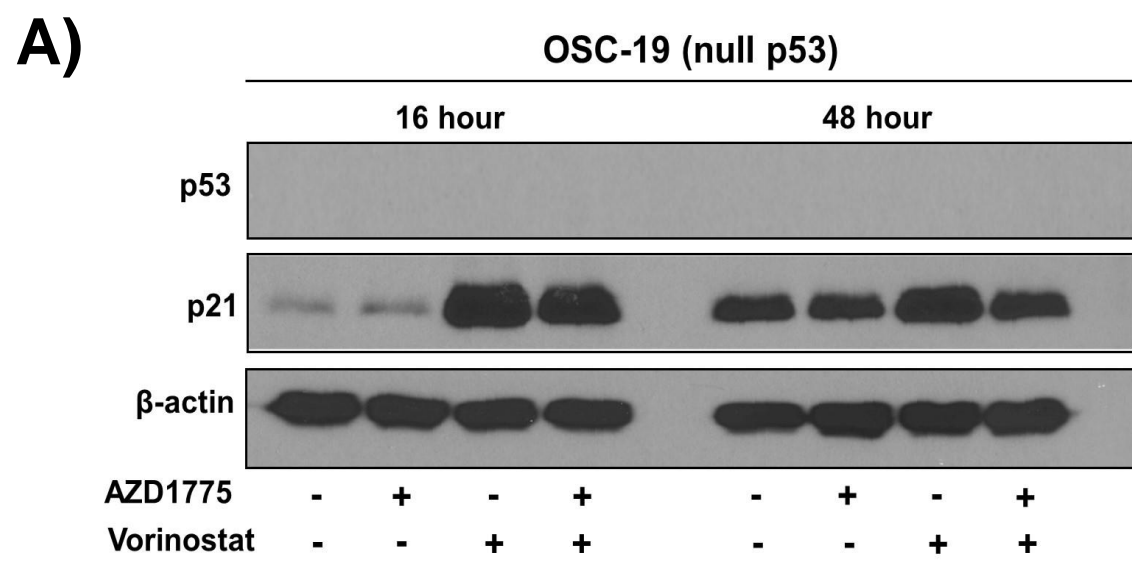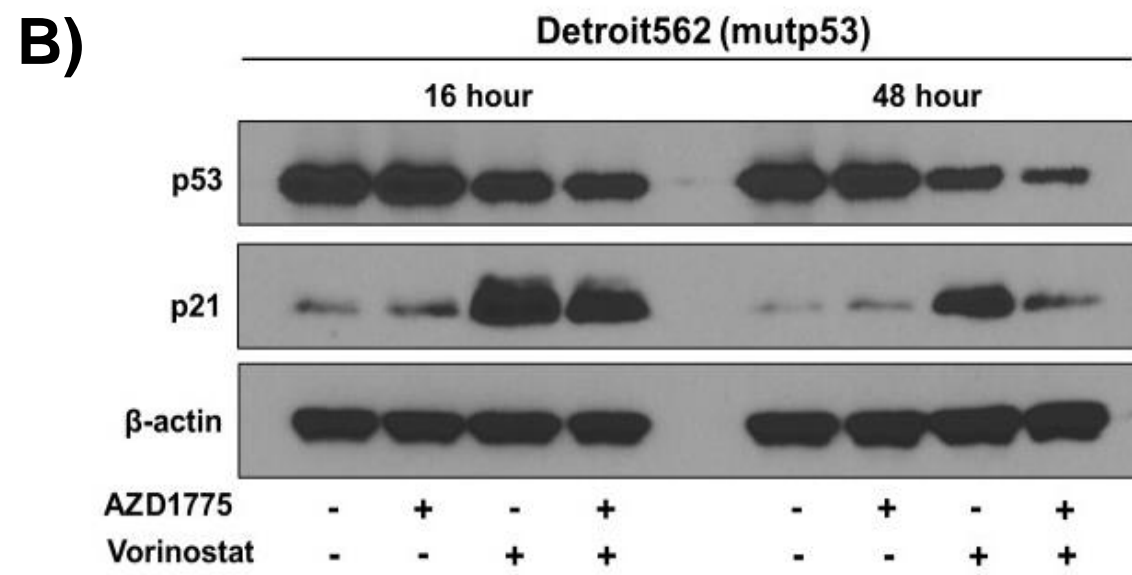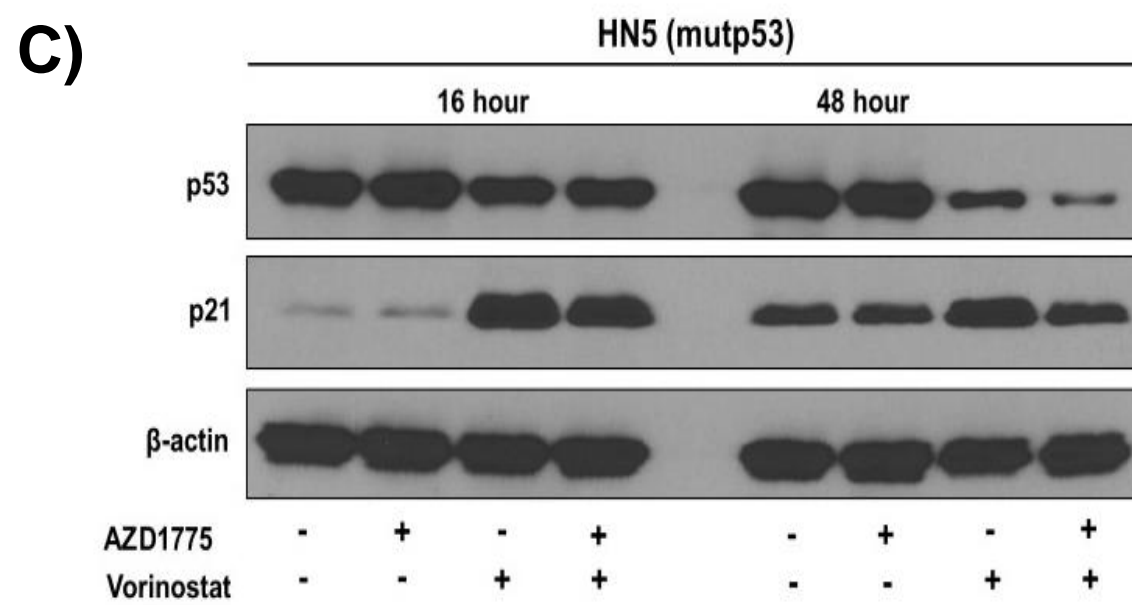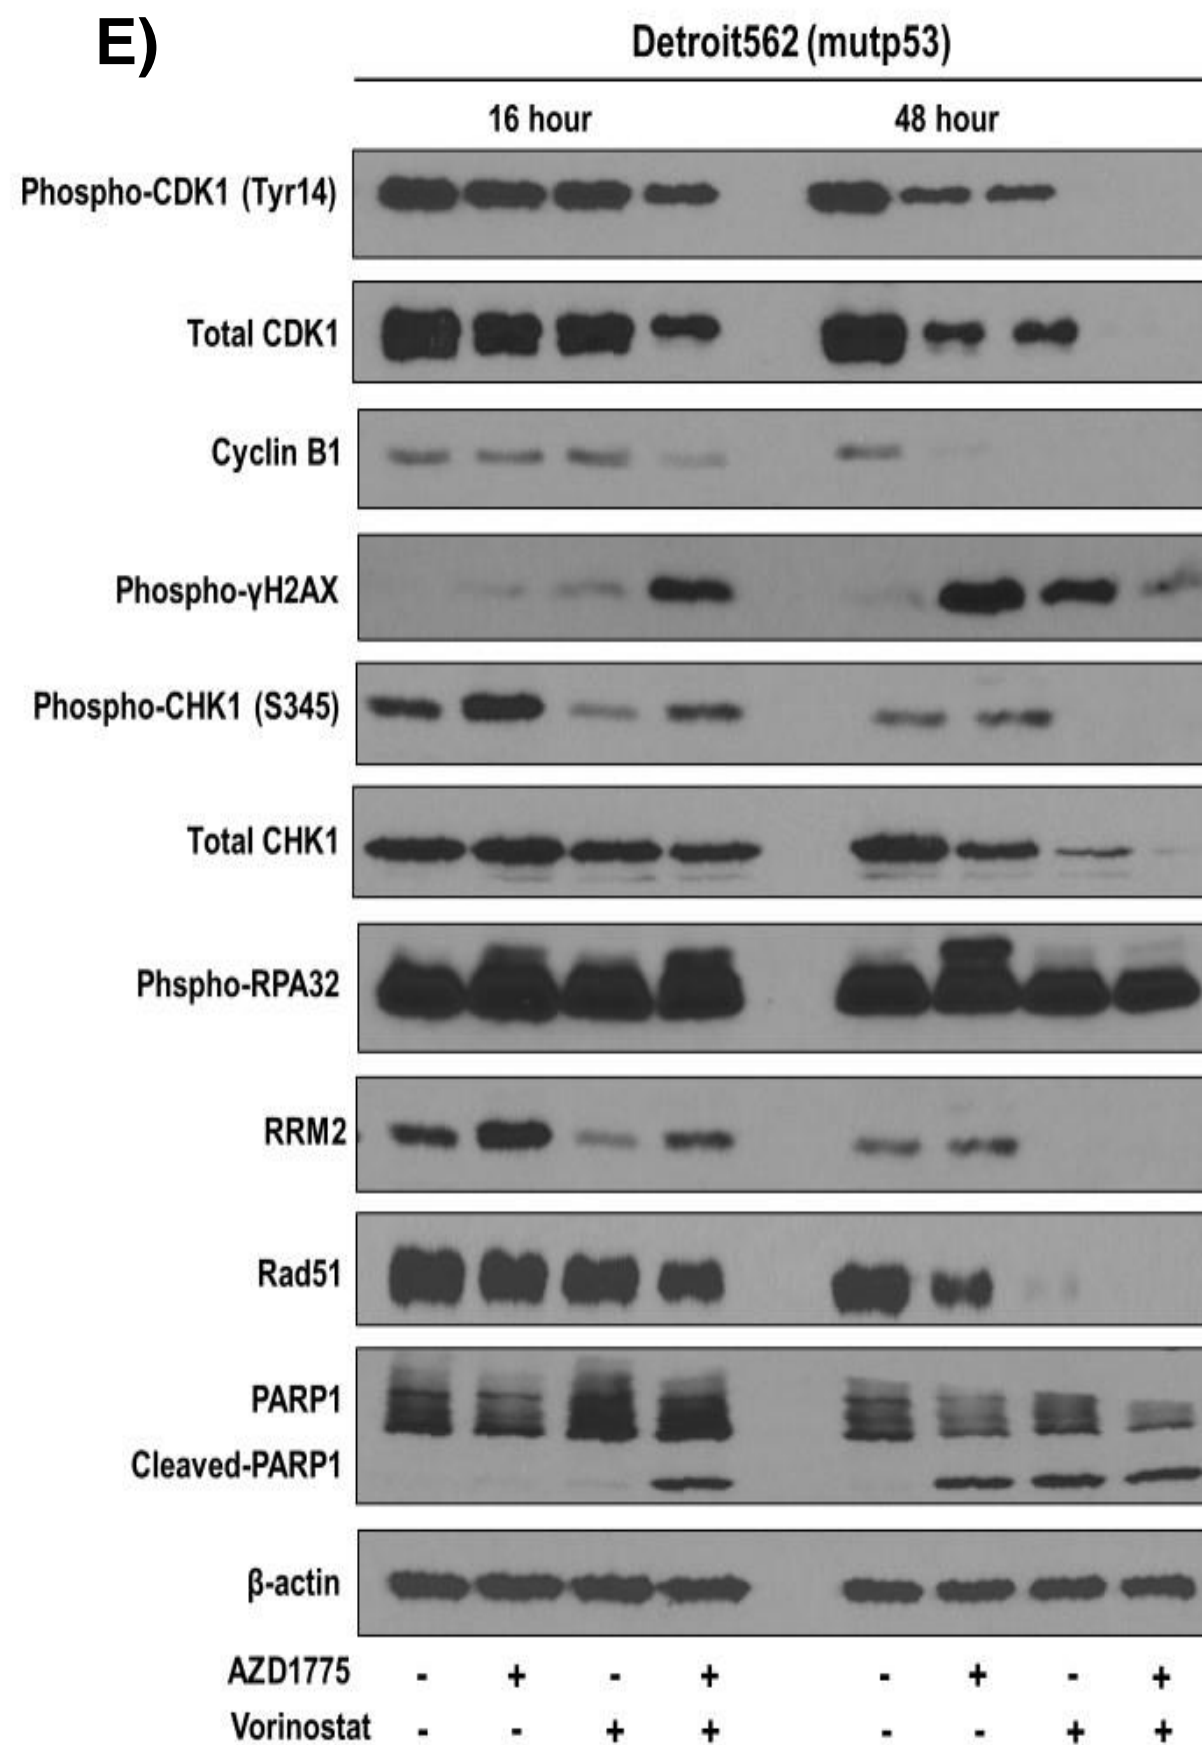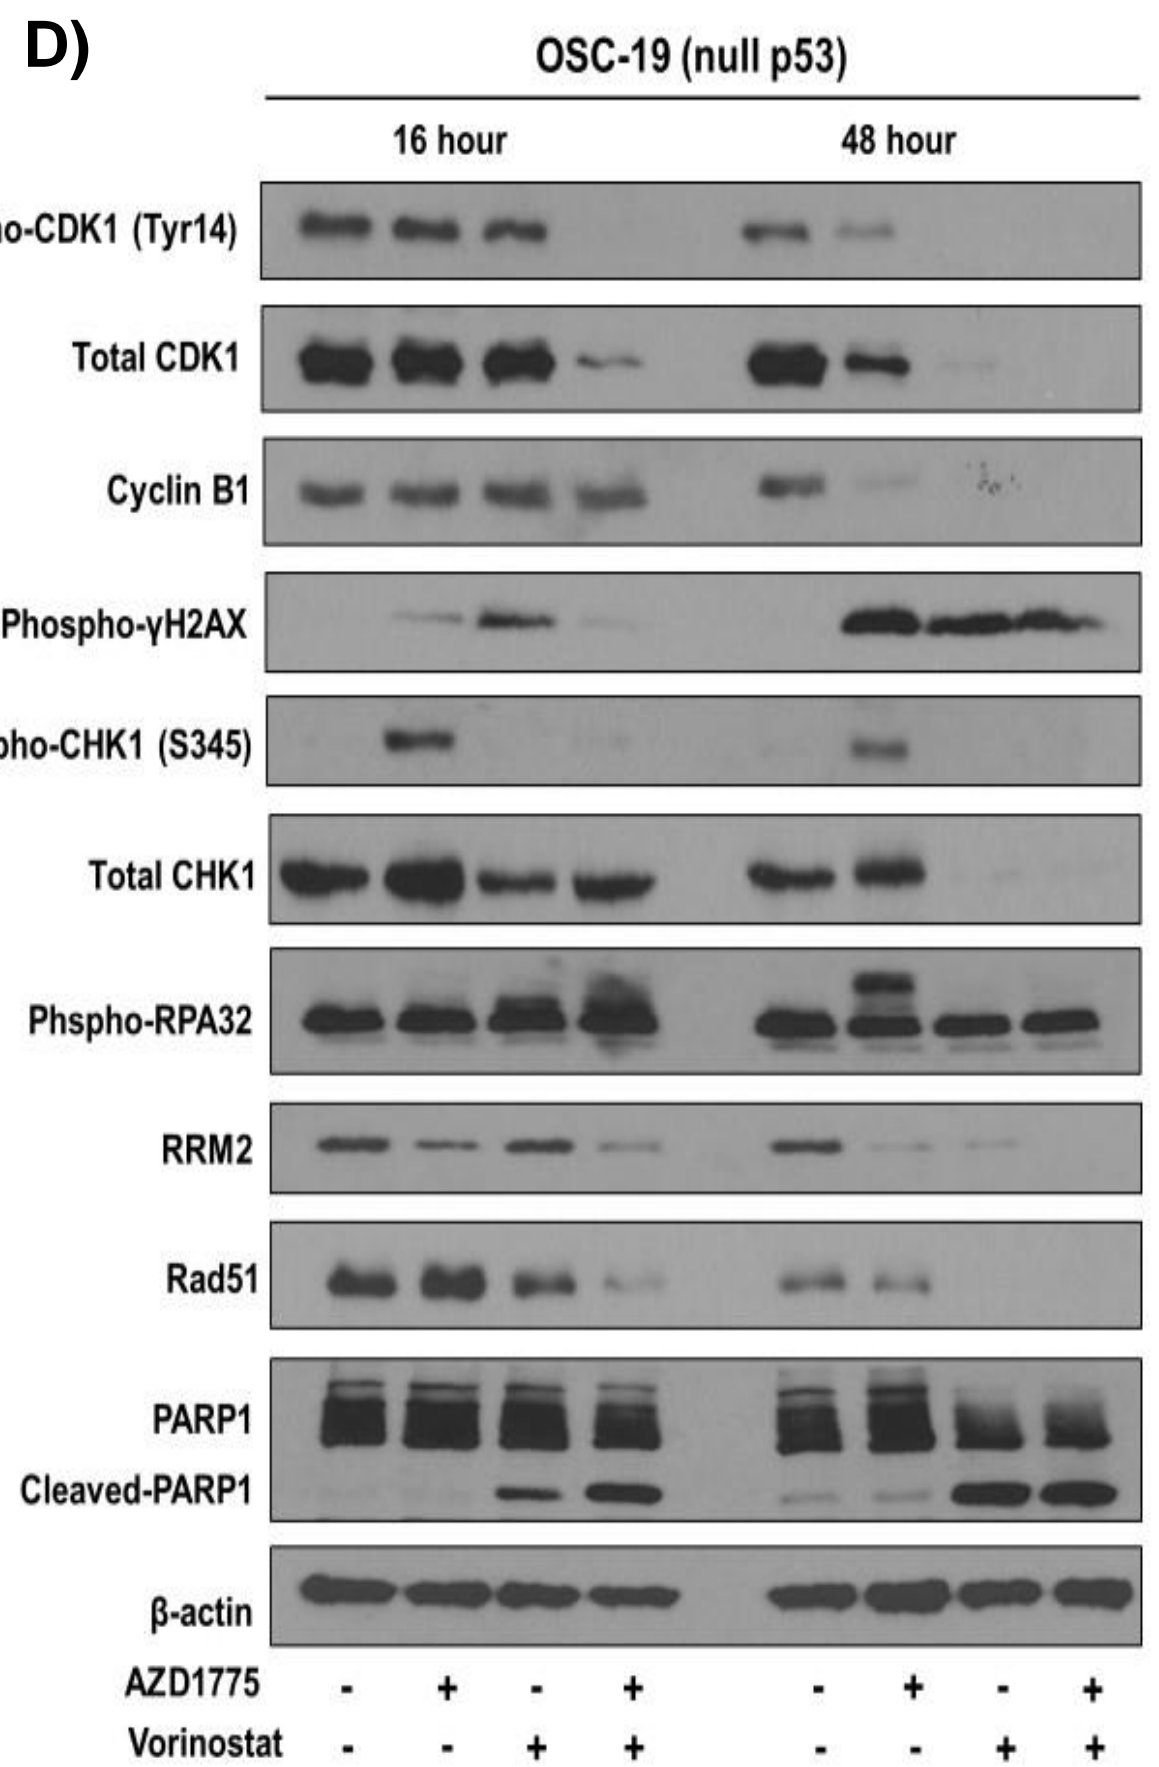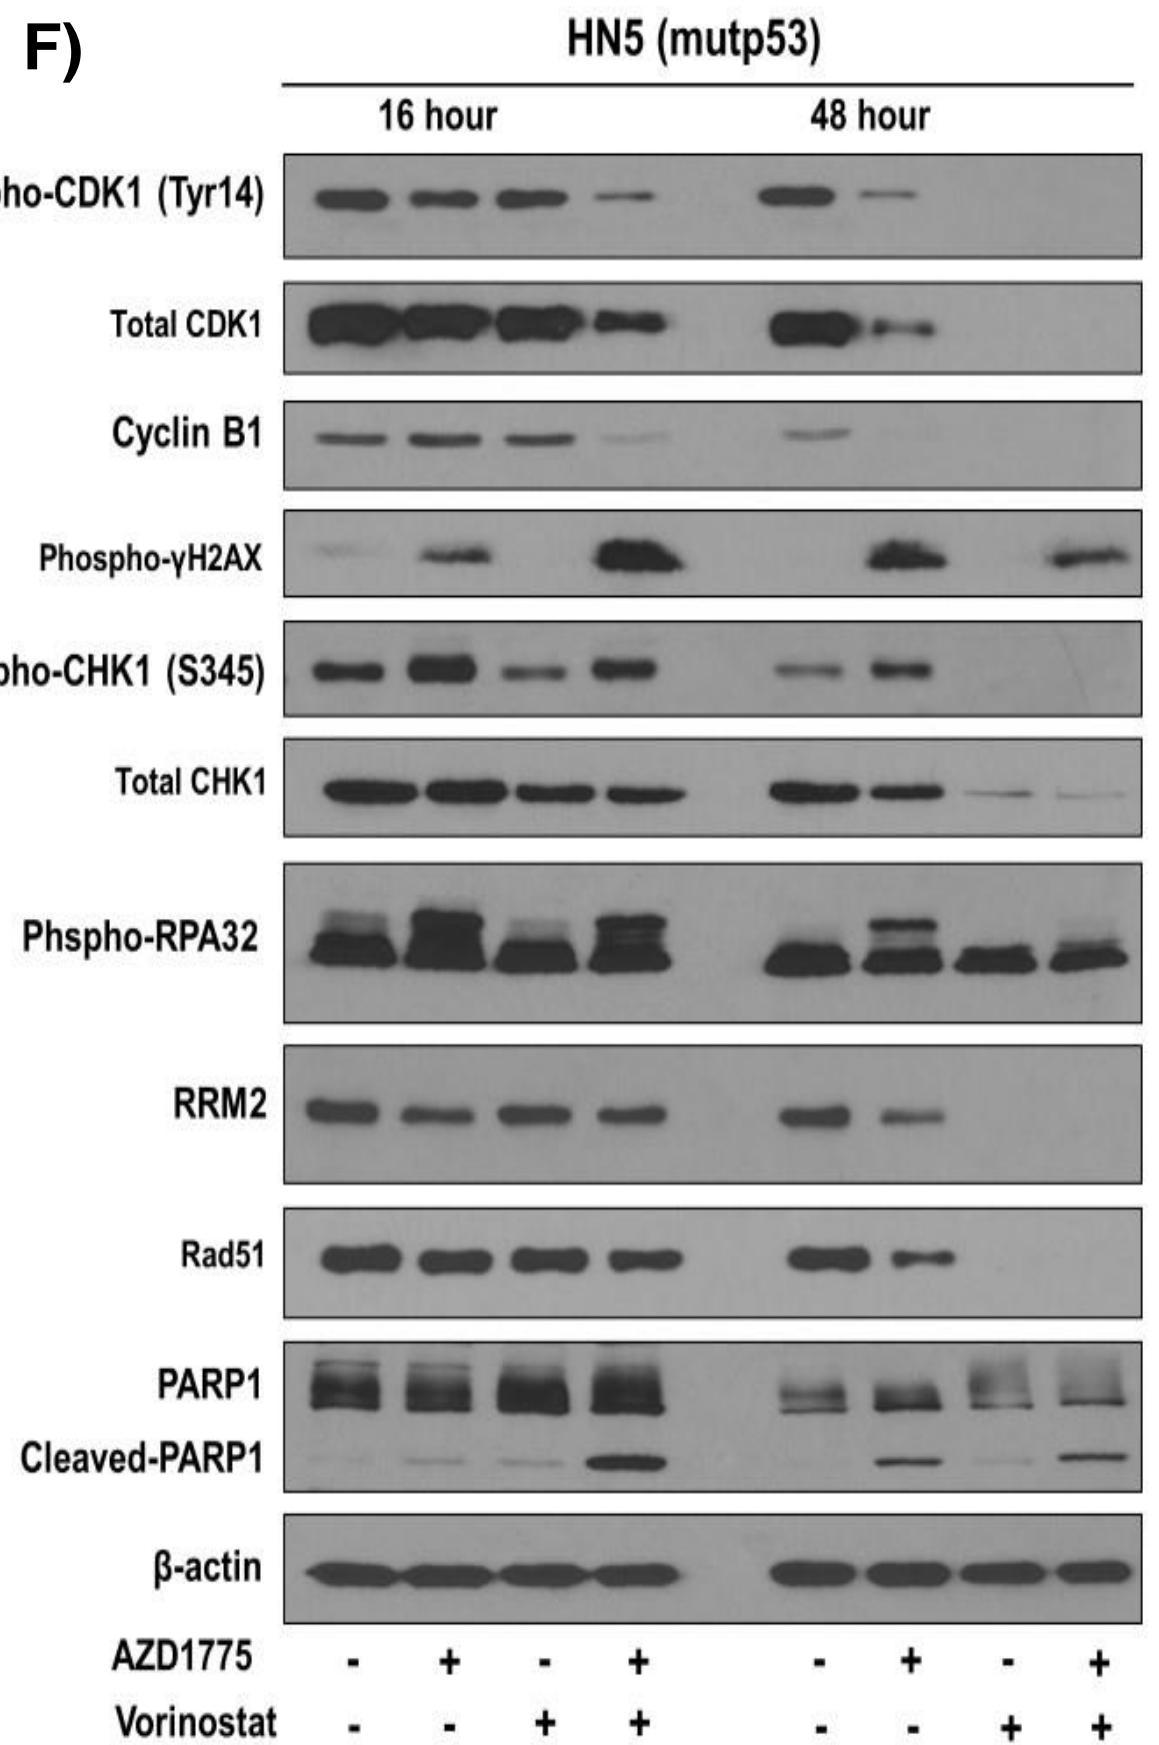

Supplementary Figure S6.

A

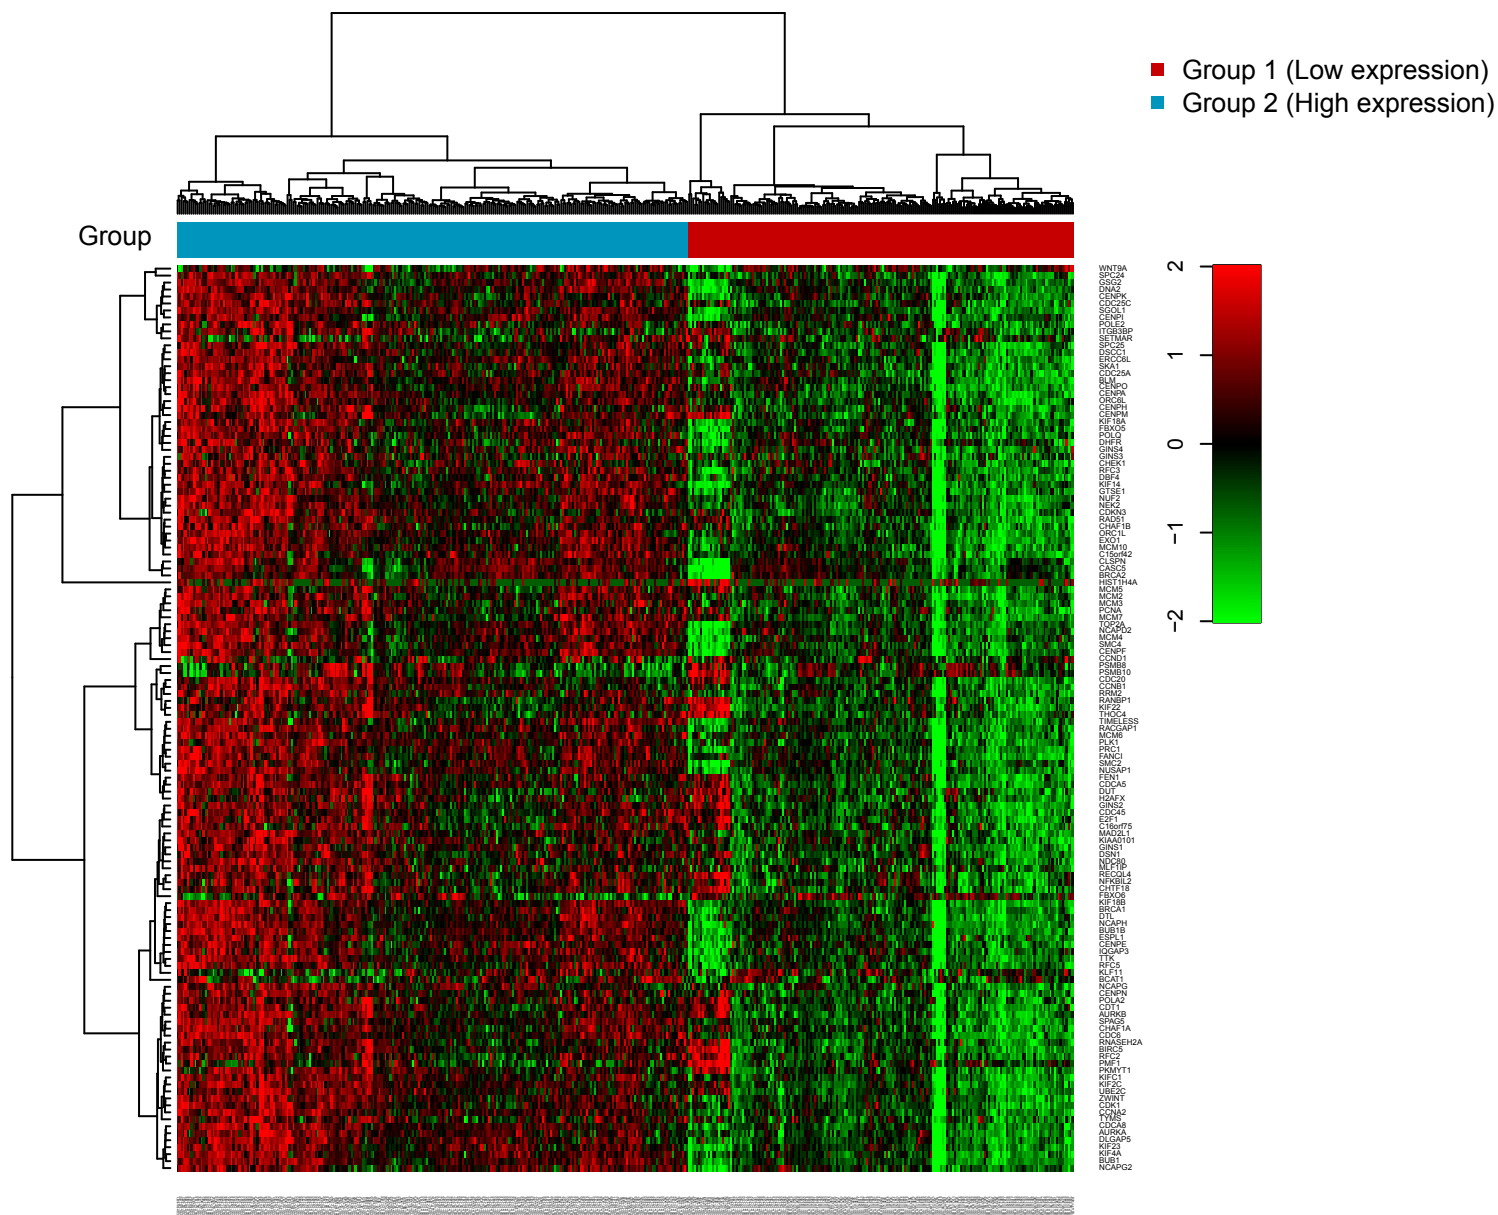

B

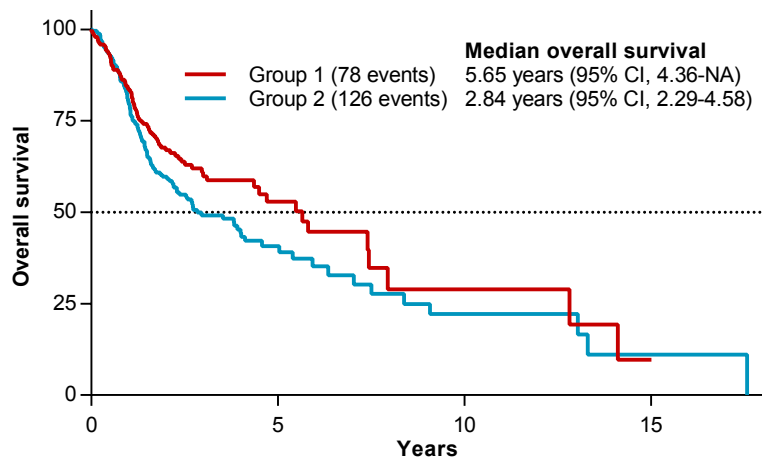

No. at risk

|         |     |    |   |   |
|---------|-----|----|---|---|
| Group 1 | 193 | 22 | 4 | 1 |
| Group 2 | 255 | 25 | 7 | 1 |

Univariate analysis

Hazard ratio, 1.32 (95% CI, 0.99-1.75)  
 P = 0.057

Multivariate analysis

Hazard ratio, 1.30 (95% CI, 0.96-1.76)  
 P = 0.094

C

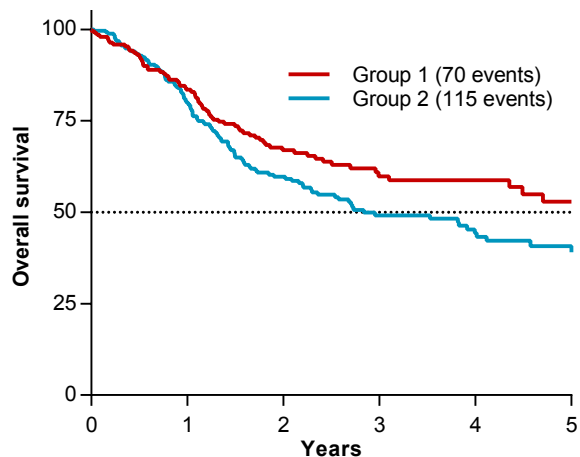

No. at risk

|         |     |     |     |    |    |    |
|---------|-----|-----|-----|----|----|----|
| Group 1 | 193 | 153 | 92  | 54 | 36 | 22 |
| Group 2 | 255 | 187 | 104 | 64 | 43 | 25 |

Univariate analysis

Hazard ratio, 1.36 (95% CI, 1.01-1.84)  
 P = 0.040

Multivariate analysis

Hazard ratio, 1.30 (95% CI, 0.95-1.79)  
 P = 0.104

Supplementary Figure S7.

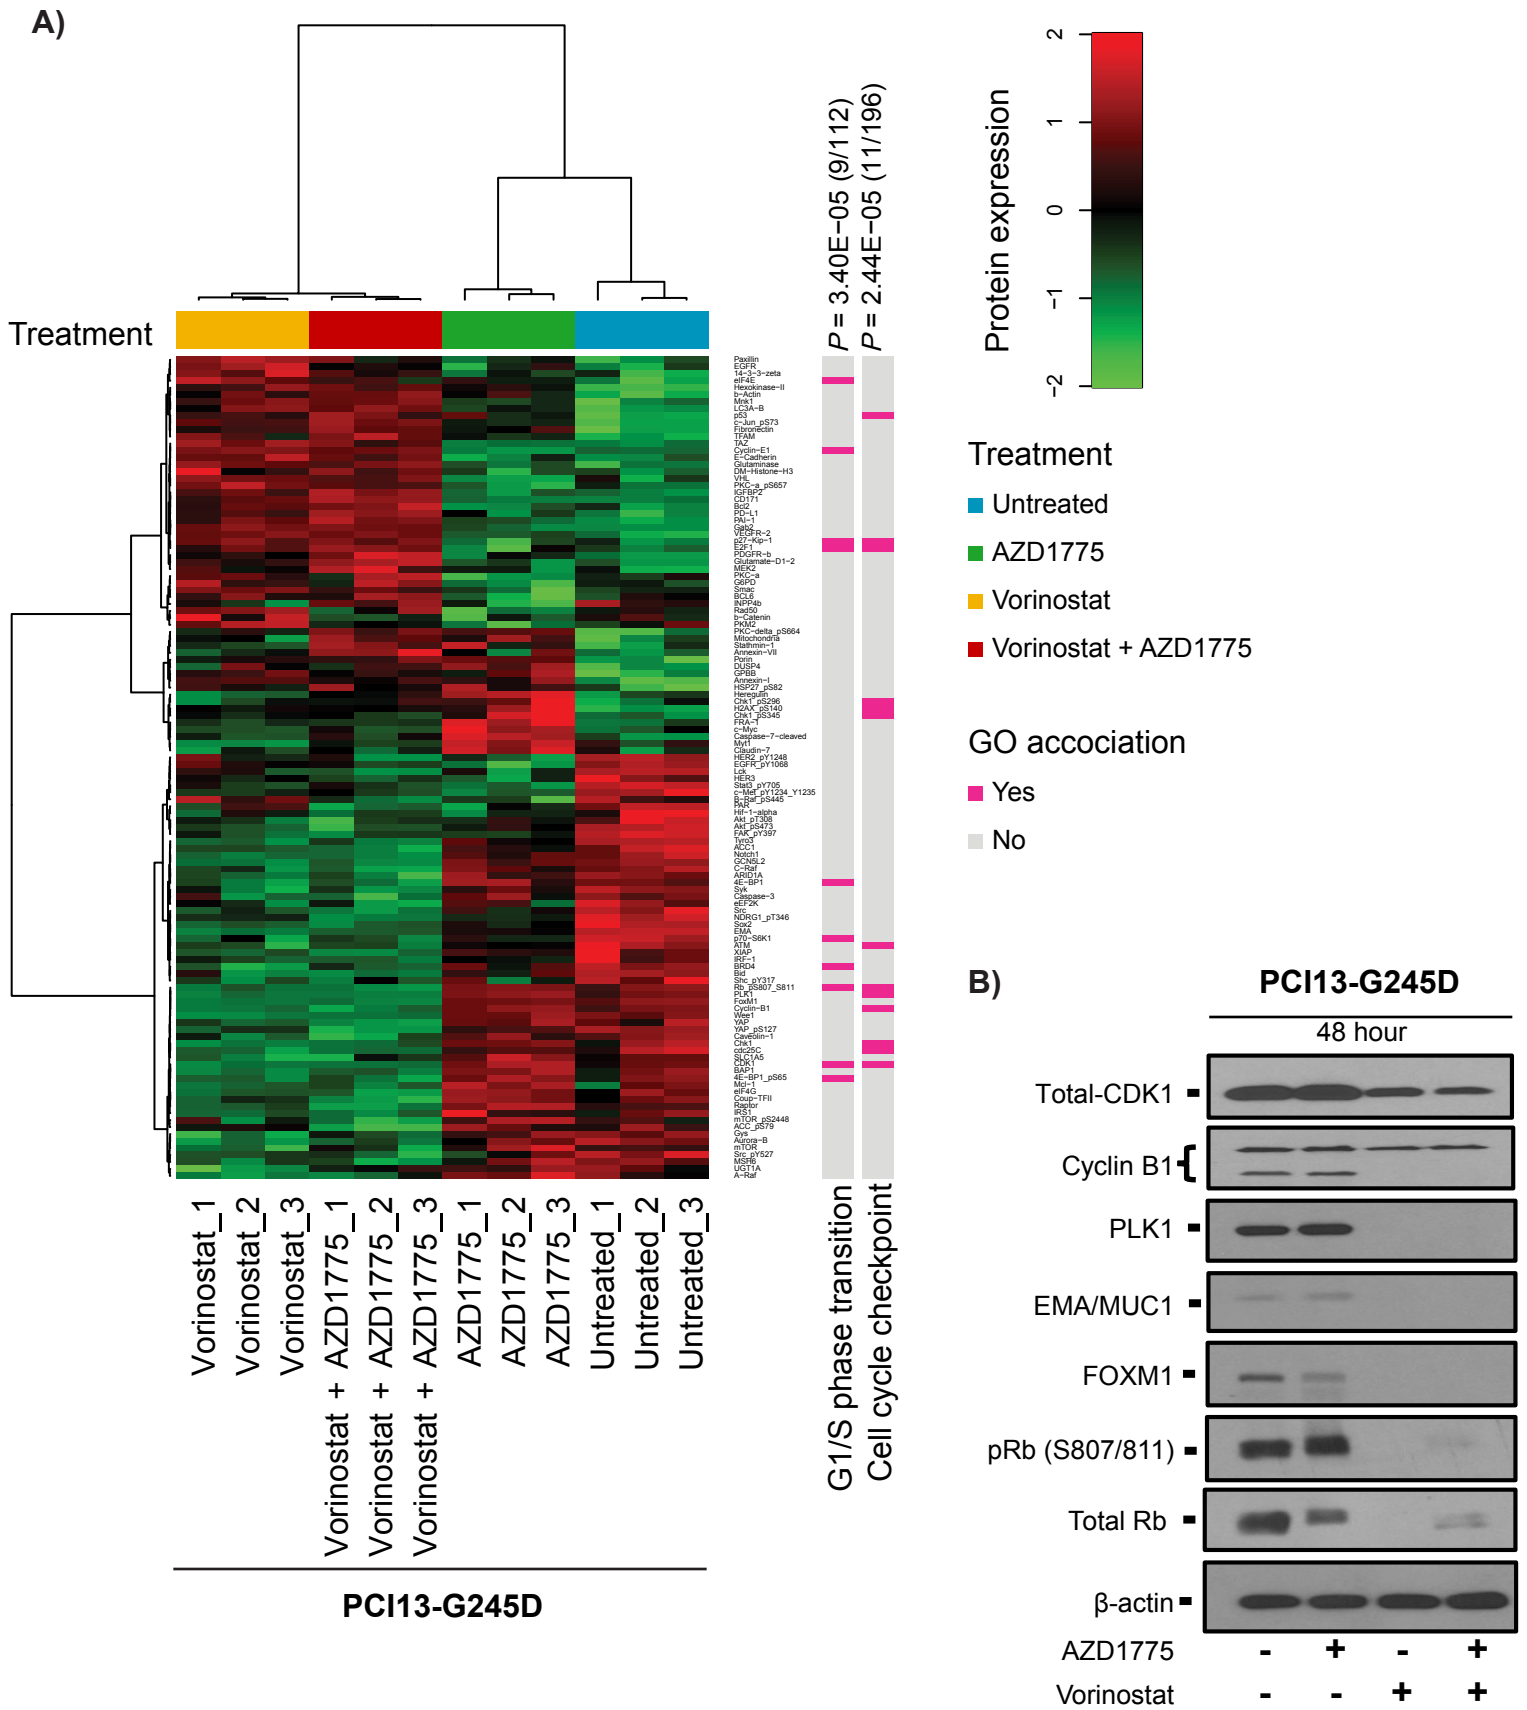

**Supplementary Figure S8.**

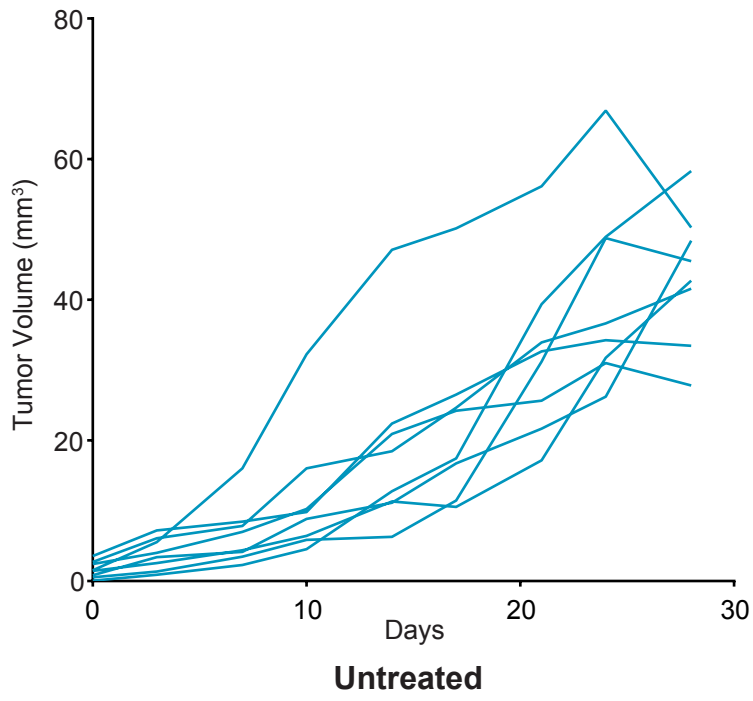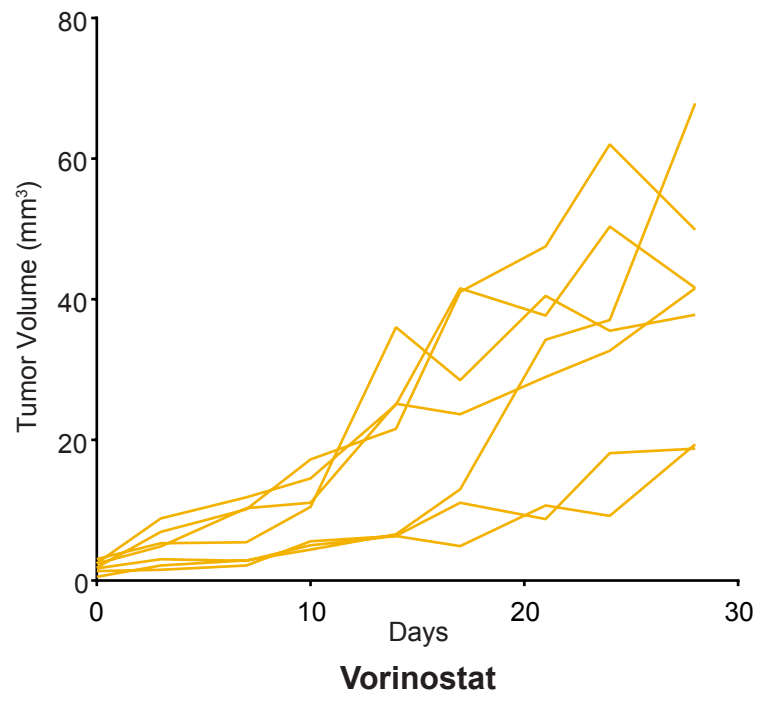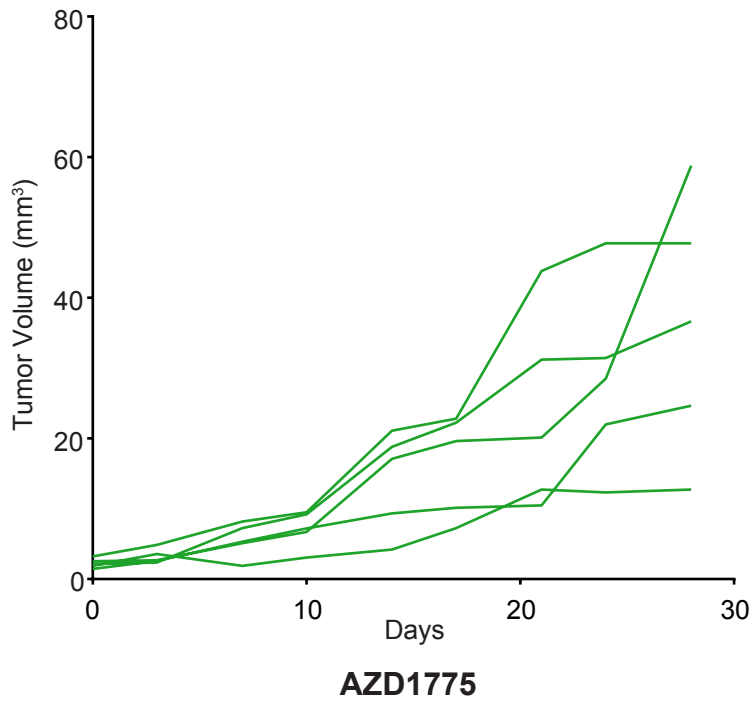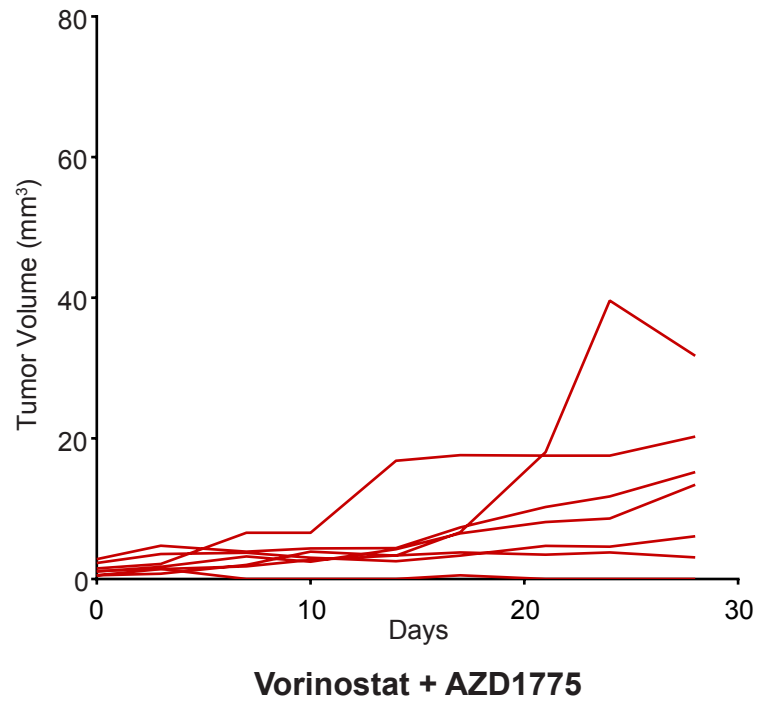



# Supplementary Figure S9

A)

PCI13-G245D p21

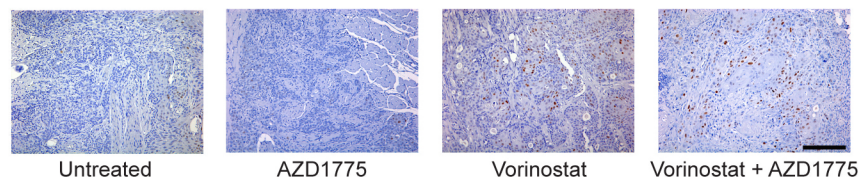

B)

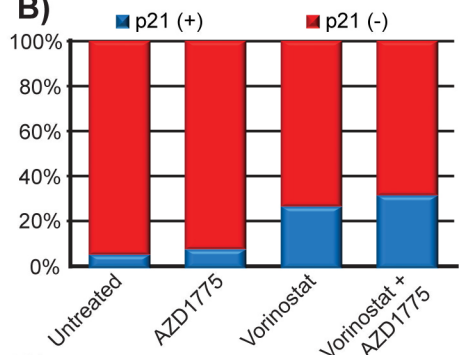

C)

PCI13-G245D PCNA

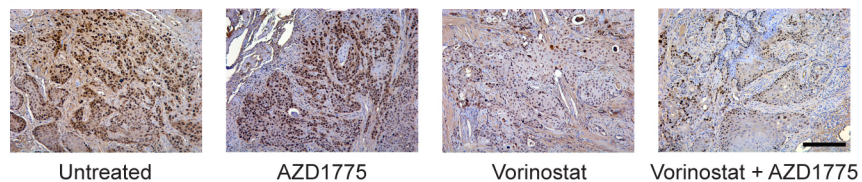

D)

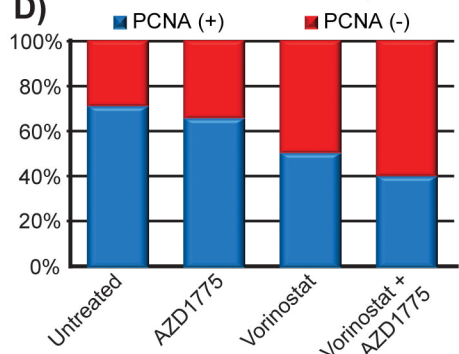

E)

PCI13-G245D Survivin

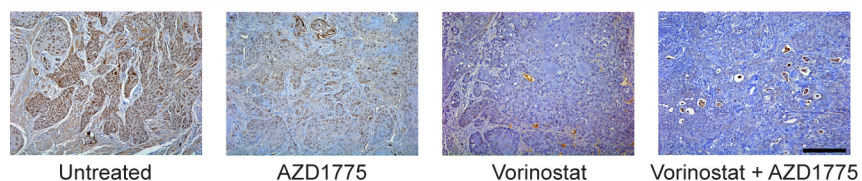

F)

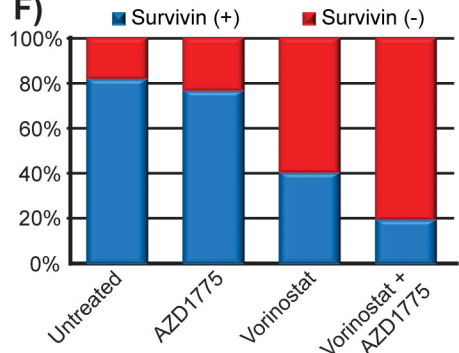

G)

PCI13-G245D RRM2

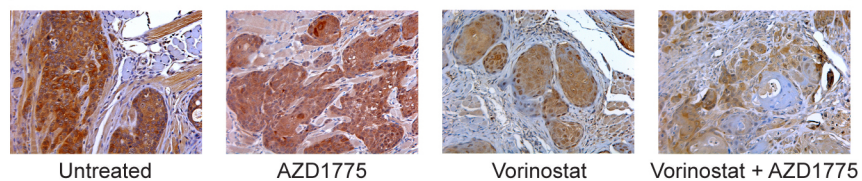

A)

## Treatment Schedule

| Day                  | 1 | 2 | 3 | 4 | 5 | 6 | 7 |
|----------------------|---|---|---|---|---|---|---|
| AZD1775 (45mg/kg)    |   | ↓ |   |   | ↓ |   |   |
| Vorinostat (65mg/kg) | ↓ | ↓ | ↓ | ↓ | ↓ |   |   |

Repeat 4 weeks

B)

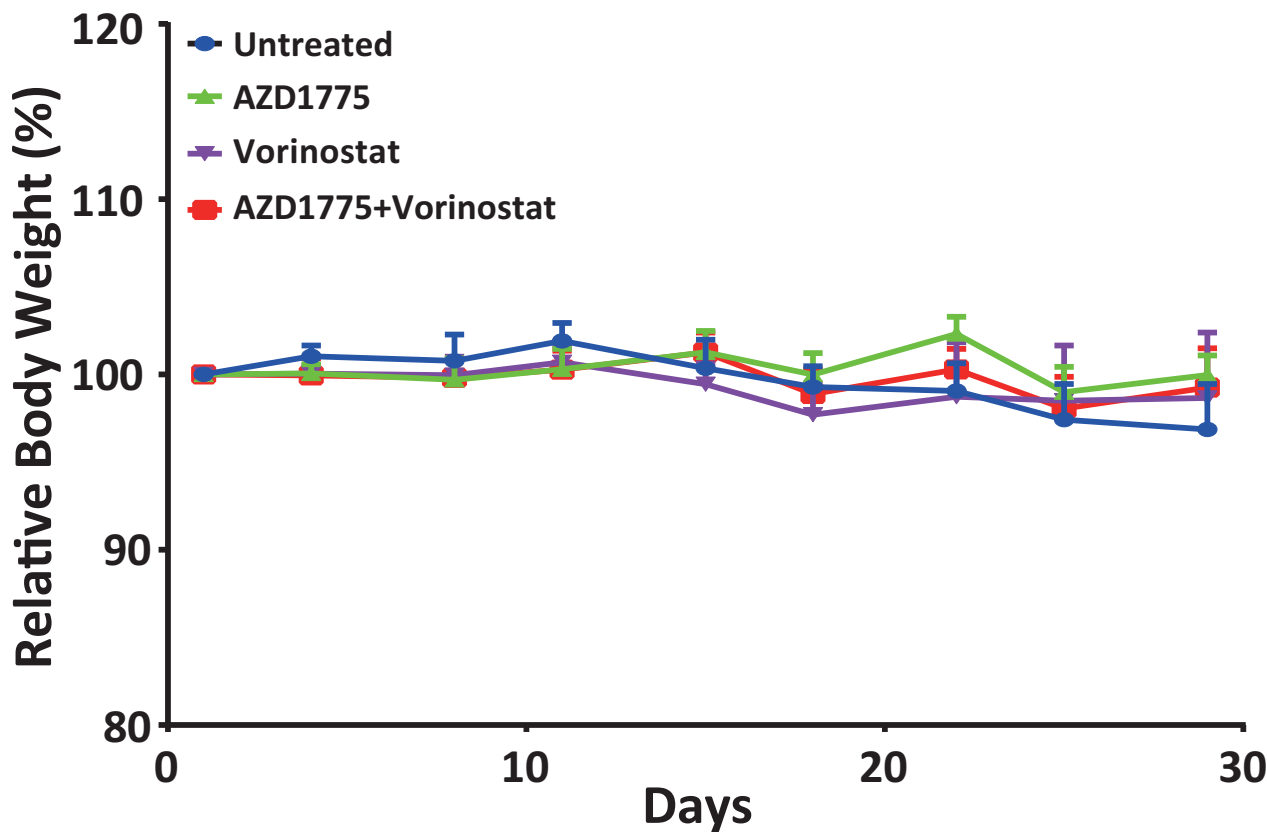

**Supplementary Table S1. CI at Fa of 0.5, 0.75 and 0.9 of vorinostat in combination with AZD1775 in various HNSCC cell lines**

| Cell line              | Drug combination     | Drug conc ( $\mu\text{M}$ ) | Drug ratio | Fa         | CI an Fa 0.5 (ED50), 0.75 (ED75) and 0.90 (ED90) respectively | Effect      |
|------------------------|----------------------|-----------------------------|------------|------------|---------------------------------------------------------------|-------------|
| PCI13-Wtp53            | Vorinostat + AZD1775 | 0.11 + 0.052                | 2:1        | 0.50 (50%) | 0.34                                                          | Synergistic |
|                        |                      | 0.19 + 0.095                | 2:1        | 0.75 (75%) | 0.22                                                          | Synergistic |
|                        |                      | 0.34 + 0.17                 | 2:1        | 0.90 (90%) | 0.14                                                          | Synergistic |
| PCI13-pBabe (null p53) | Vorinostat + AZD1775 | 0.21 + 0.21                 | 1:1        | 0.50 (50%) | 0.90                                                          | Synergistic |
|                        |                      | 0.42 + 0.42                 | 1:1        | 0.75 (75%) | 0.66                                                          | Synergistic |
|                        |                      | 0.84 + 0.84                 | 1:1        | 0.90 (90%) | 0.49                                                          | Synergistic |
| PCI13-C238F            | Vorinostat + AZD1775 | 0.07 + 0.07                 | 1:1        | 0.50 (50%) | 0.30                                                          | Synergistic |
|                        |                      | 0.15 + 0.15                 | 1:1        | 0.75 (75%) | 0.23                                                          | Synergistic |
|                        |                      | 0.30 + 0.30                 | 1:1        | 0.90 (90%) | 0.19                                                          | Synergistic |
| PCI13-G245D            | Vorinostat + AZD1775 | 0.08 + 0.08                 | 1:1        | 0.50 (50%) | 0.38                                                          | Synergistic |
|                        |                      | 0.16 + 0.16                 | 1:1        | 0.75 (75%) | 0.29                                                          | Synergistic |
|                        |                      | 0.32 + 0.32                 | 1:1        | 0.90 (90%) | 0.23                                                          | Synergistic |
| HN30-Wtp53             | Vorinostat + AZD1775 | 0.08 + 0.04                 | 2:1        | 0.50 (50%) | 0.32                                                          | Synergistic |
|                        |                      | 0.18 + 0.09                 | 2:1        | 0.75 (75%) | 0.23                                                          | Synergistic |
|                        |                      | 0.34 + 0.17                 | 2:1        | 0.90 (90%) | 0.17                                                          | Synergistic |
| HN31-Mutp53            | Vorinostat + AZD1775 | 0.09 + 0.09                 | 1:1        | 0.50 (50%) | 0.55                                                          | Synergistic |
|                        |                      | 0.19 + 0.19                 | 1:1        | 0.75 (75%) | 0.44                                                          | Synergistic |
|                        |                      | 0.40 + 0.40                 | 1:1        | 0.90 (90%) | 0.35                                                          | Synergistic |
| OSC-19 (null p53)      | Vorinostat + AZD1775 | 0.024 + 0.0024              | 10:1       | 0.50 (50%) | 0.52                                                          | Synergistic |
|                        |                      | 0.044 + 0.0044              | 10:1       | 0.75 (75%) | 0.49                                                          | Synergistic |
|                        |                      | 0.080 + 0.0080              | 10:1       | 0.90 (90%) | 0.47                                                          | Synergistic |
| Detroit562-Mutp53      | Vorinostat + AZD1775 | 0.028 + 0.0028              | 10:1       | 0.50 (50%) | 0.60                                                          | Synergistic |
|                        |                      | 0.052 + 0.0052              | 10:1       | 0.75 (75%) | 0.57                                                          | Synergistic |
|                        |                      | 0.096 + 0.0096              | 10:1       | 0.90 (90%) | 0.55                                                          | Synergistic |
| HN5-Mutp53             | Vorinostat + AZD1775 | 0.013 + 0.0013              | 10:1       | 0.50 (50%) | 0.73                                                          | Synergistic |
|                        |                      | 0.023 + 0.0023              | 10:1       | 0.75 (75%) | 0.77                                                          | Synergistic |
|                        |                      | 0.042 + 0.0042              | 10:1       | 0.90 (90%) | 0.82                                                          | Synergistic |

CI = Combination indexes; Fa = fraction affected. CI value < 1.0 indicates synergistic interaction.
